# Supplementary material for: N-Monoarylated dihydrophenazines in reduced and oxidized states as efficient organo-photocatalysts
Source: Royal Society of Chemistry journal article supplement (doi:10.1039/d4cc06499b), 2025-01-01
Supplement: d4cc06499b1.pdf [file d4cc06499b1.pdf]

## Supporting Information

# N-monoarylated dihydrophenazines reduced and oxidized states as efficient organo-photocatalysts

Maurizio Prato\*<sup>abc</sup> and Jacopo Dosso\*<sup>a</sup>

Department of Chemical and Pharmaceutical Sciences, CENMAT, Centre of Excellence for Nanostructured Materials, INSTM UdR Trieste, University of Trieste, via Licio Giorgieri 1, 34127 Trieste, Italy.

Centre for Cooperative Research in Biomaterials (CIC BiomaGUNE), Basque Research and Technology Alliance (BRTA), Paseo de Miramón 194, 20014, Donostia San Sebastián, Spain

Basque Fdn Sci, Ikerbasque, 48013 Bilbao, Spain.

## Summary

|                                                                               |    |
|-------------------------------------------------------------------------------|----|
| <b>1.0 General Remarks</b> .....                                              | 2  |
| <b>1.1 Instrumentation</b> .....                                              | 2  |
| <b>1.2 Materials and methods</b> .....                                        | 3  |
| <b>2.0 Synthetic procedures and spectral data</b> .....                       | 4  |
| <b>2.1 Synthesis of 2</b> .....                                               | 4  |
| <b>2.2 Synthesis of 1</b> .....                                               | 5  |
| <b>2.3 Synthesis of 1<sup>ox</sup></b> .....                                  | 5  |
| <b>3.0 Photophysical and electrochemical characterization</b> .....           | 7  |
| <b>4.0 Electrochemical characterization</b> .....                             | 15 |
| <b>5.0 Photocatalytic Reaction optimization and entries</b> .....             | 17 |
| <b>5.1 Reduction reaction optimization and dehalogenation reactions</b> ..... | 17 |
| <b>5.2 General procedure for photocatalytic reduction experiments</b> .....   | 18 |
| <b>5.3 Oxidation reaction optimization</b> .....                              | 19 |
| <b>5.4 General procedure for photocatalytic oxidation experiments</b> .....   | 20 |
| <b>5.5 Oxidation reaction scope</b> .....                                     | 20 |
| <b>6.0 NMR Reversibility studies</b> .....                                    | 24 |
| <b>7.0 NMR and HRMS spectroscopic characterization</b> .....                  | 26 |
| <b>7.1 Derivative 2</b> .....                                                 | 26 |
| <b>7.2 Derivative 3</b> .....                                                 | 27 |
| <b>7.3 Derivative 1</b> .....                                                 | 29 |
| <b>7.4 Derivative 1<sup>ox</sup></b> .....                                    | 32 |
| <b>8.0 Dehalogenation Reactions</b> .....                                     | 34 |
| <b>9.0 Oxidation Reactions products</b> .....                                 | 37 |
| <b>9.1 7a NMR Spectra</b> .....                                               | 37 |
| <b>9.2 7b NMR Spectra</b> .....                                               | 38 |
| <b>9.3 7c NMR Spectra</b> .....                                               | 39 |
| <b>9.4 7d NMR Spectra</b> .....                                               | 40 |

|                          |    |
|--------------------------|----|
| 9.5 7e NMR Spectra.....  | 41 |
| 9.6 7f NMR Spectra ..... | 42 |
| 9.7 7g NMR Spectra.....  | 43 |
| 9.8 7h NMR Spectra ..... | 44 |
| 10 References .....      | 45 |

## 1.0 General Remarks

### 1.1 Instrumentation

*Thin layer chromatography* (TLC) was performed on Sigma Aldrich pre-coated aluminium sheets (0.25 mm layer thickness, 60 Å porosity and fluorescent indicator GF254) and were visualized using 254 or 365 nm light. Flash column chromatography was carried out using Merck Gerduran silica gel 60 (particle size 40–63 µm). *Nuclear magnetic resonance* (NMR) <sup>1</sup>H, and <sup>13</sup>C spectra were obtained on Varian Inova spectrometer (500 MHz <sup>1</sup>H and 126 MHz <sup>13</sup>C) or Varian 400 MHz NMR spectrometer (400 MHz <sup>1</sup>H and 101 MHz <sup>13</sup>C). Chemical shifts were reported in ppm according to tetramethylsilane using the solvent residual signal as an internal reference (CDCl<sub>3</sub>: δ<sub>H</sub> = 7.26 ppm, δ<sub>C</sub> = 77.16 ppm, CD<sub>3</sub>CN: δ<sub>H</sub> = 1.94 ppm, δ<sub>C</sub> = 1.32, 118.26 ppm, DMSO-*d*<sub>6</sub>: δ<sub>H</sub> = 2.50 ppm, δ<sub>C</sub> = 39.52 ppm). Coupling constants (*J*) were given in Hz and were averaged. Resonance multiplicity was described as s (singlet), d (doublet), t (triplet), m (multiplet), br (broad signal), dd (doublet of doublets), dt (doublet of triplets). Carbon spectra were acquired with a complete decoupling for the proton, unless specified. All spectra were recorded at 25°C unless specified. *Infrared spectra* (IR) were recorded on a Shimadzu IR Affinity 1S FTIR spectrometer in ATR mode with a diamond mono-crystal. Selected absorption bands are reported in wavenumber (cm<sup>-1</sup>). *ESI-High resolution mass spectrometry* (ESI-HRMS). ESI-HRMS was performed at University of Trieste Chemistry department, High resolution mass spectra (HRMS) were obtained on Bruker micrOTOF-Q (ESI-TOF). *Photophysical analysis* Absorption spectra of compounds were recorded on air equilibrated solutions at room temperature with an Agilent Cary 5000 UV-Vis spectrophotometer, using quartz cells with path length of 1.0 cm. Emission measurements were performed on an Edinburgh instruments FS5 spectrofluorometer using a 150 W CW Ozone-free xenon arc lamp as source and a Photomultiplier R928P (spectral coverage 200 nm – 900 nm, cooled and stabilised) as detector. Quantum yields were performed using the integrating sphere setup SC-30 on a sample solution in a quartz cuvette and using the same solvent in another cuvette as reference. Luminescence lifetimes were measured with an Edinburgh Instruments FS5 time-correlated single-photon counting spectrofluorimeter, exciting the sample at 280 nm with a picosecond pulsed diode laser (EPLED - 280 Edinburgh Instruments). *Cyclic voltammetry* The electrochemical characterizations were carried out at room temperature, on an Autolab 302 N electrochemical workstation (Metrohm, The Netherlands) in a glass cell from CH Instruments (10 mL, CHI220). A typical three-electrode cell was employed, which was composed of glassy carbon (GC) working electrode (3 mm diameter), a platinum wire as counter electrode and a saturated calomel electrode (SCE) as reference electrode (RE). RE was connected to the glass cell

through a salt bridge. Oxygen was removed by purging the solution with Argon. The GC electrode was polished twice before use with 0.05 and 0.1 colloidal silica polishing suspension and ultrasonically rinsed with deionized water for 15 minutes. ***Photochemical reaction set up*** The light-driven reactions were set up under an argon atmosphere in Schlenk tubes or glass vials unless otherwise stated. The light sources used in this work were purchased from Kessil. Detail Kessil lamp 427 nm PR160L-427 (50W). <https://www.kessil.com/science/PR160L.php>

## **1.2 Materials and methods**

Chemicals were purchased from Sigma Aldrich, TCI, Alfa Aesar and Fluorochem and were used as received unless otherwise stated. Solvents were purchased from Sigma Aldrich and Alfa Aesar, while deuterated solvents from Eurisotop and Sigma Aldrich. Anhydrous conditions were achieved by repeated cycles of flaming with a heat gun under vacuum and purging with Argon (Ar). The inert atmosphere was maintained using Argon-filled balloons equipped with a syringe and needle that was used to penetrate the silicon stoppers used to close the flask's necks. Additions of liquid reagents were performed using plastic syringes. Degassing of solutions was performed by bubbling argon in the reaction under sonication for at least 10 minutes or alternatively by 3 freeze pump thaw cycles. The latter was performed by freezing the solution with liquid N<sub>2</sub> and keeping the frozen solvent under vacuum for 5 to 10 min., followed by thawing. Dry solvents were obtained commercially. MilliQ water was obtained from a Millipore Milli-Q Plus 185 apparatus and presented a resistivity of 18.2 MΩcm. MilliQ water was always used unless otherwise specified.

## 2.0 Synthetic procedures and spectral data

### 2.1 Synthesis of 2

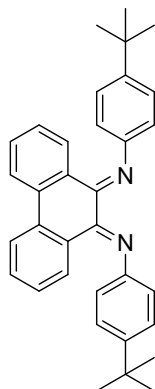

9,10-Phenanthroquinone (500 mg, 2.4 mmol) was added in a single necked flask and dissolved in  $\text{CH}_2\text{Cl}_2$  (50 mL). The reaction was then cooled to  $0^\circ\text{C}$  and 4-*t*BuAniline (1.64 mL, 10.3 mmol) slowly added, followed by dry pyridine (1.95 mL, 24 mmol).  $\text{TiCl}_4$  (0.87 mL, 7.92 mmol) was then added under Ar and the resulting dark mixture stirred at r.t. for 18 h. The solution was then diluted with diethyl ether (100 mL), stirred for 10 min, and filtered on celite to remove the solid. The solvent was evaporated to give a dark red viscous product, which was precipitated by addition of MeOH (20 mL), the final purification was performed on silica gel plug (PE/ $\text{CH}_2\text{Cl}_2$  8/2) affording **2** as an orange powder (450 mg, 40%) along with diamine **3** (100 mg, 9%) as major byproduct.

**2**:  $^1\text{H-NMR}$  (400 MHz,  $\text{CDCl}_3$ )  $\delta$  8.12 (dd,  $J = 7.7, 1.1$  Hz, 2H), 7.93 (d,  $J = 7.8$  Hz, 2H), 7.59 (td,  $J = 7.6, 1.4$  Hz, 2H), 7.47 (td,  $J = 7.5, 1.1$  Hz, 2H), 7.01 (d,  $J = 8.7$  Hz, 4H), 6.21 (d,  $J = 8.6$  Hz, 4H), 1.32 (s, 18H).  $^{13}\text{C-NMR}$  (101 MHz,  $\text{CDCl}_3$ )  $\delta$  159.55, 147.40, 146.91, 135.78, 134.73, 131.55, 128.92, 126.67, 125.65, 123.70, 119.39, 34.42, 31.57. IR (ATR)  $\nu$  ( $\text{cm}^{-1}$ ): 3063, 2957, 2866, 1593, 1504, 1449, 1362, 1267, 1180, 1119, 1022, 957, 829, 756, 725, 617, 563, 534, 476, 440, 419. ESI-HRMS:  $[\text{M-H}]^+$  calc. for  $[\text{C}_{34}\text{H}_{33}\text{N}_2]^+$ : 469.2638; found 469.2649 (cyclization and oxidation occurs during analysis).

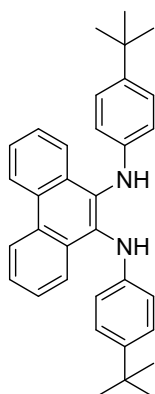

**3**:  $^1\text{H-NMR}$  (400 MHz,  $\text{ACN-}d_3$ )  $\delta$  8.80 (d,  $J = 8.2$  Hz, 2H), 7.93 (dd,  $J = 8.2, 1.2$  Hz, 2H), 7.63 (ddd,  $J = 8.3, 7.0, 1.4$  Hz, 2H), 7.51 (ddd,  $J = 8.2, 7.0, 1.2$  Hz, 2H), 7.10 (d,  $J = 8.7$  Hz, 4H), 6.53 (d,  $J = 8.7$  Hz, 4H), 6.48 (s, 2H), 1.21 (s, 18H).  $^{13}\text{C-NMR}$  (101 MHz,  $\text{ACN-}d_3$ )  $\delta$  145.75, 142.58, 132.09, 131.00, 130.71, 127.61,

127.06, 126.72, 125.84, 124.06, 115.98, 34.46, 31.68. IR (ATR)  $\nu$  ( $\text{cm}^{-1}$ ): 3397, 3375, 2957, 2864, 1612, 1514, 1360, 1333, 1292, 1254, 1190, 1028, 818, 762, 725, 546, 419. ESI-HRMS:  $[\text{M}+\text{H}]^+$  calc. for  $[\text{C}_{34}\text{H}_{37}\text{N}_2]^+$ : 473.2951; found 473.2963.

## 2.2 Synthesis of **1**

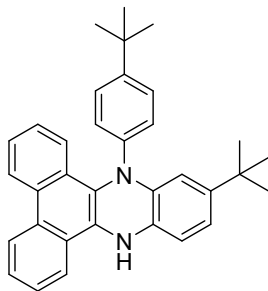

In a round bottom flask equipped with a condenser **2** (300 mg, 0.64 mmol) was dissolved in a mixture of THF/EtOH (1/1, 15 mL).  $\text{NaBH}_4$  (24 mg, 0.64 mmol) added, and the reaction heated at  $80^\circ\text{C}$  for 3h. The reaction was then evaporated and purified by filtration on a TEA neutralized silica plug using 8/2/0.5 PE/ $\text{CH}_2\text{Cl}_2$ /TEA as eluent to remove the main impurity, followed by 9.5/0.5  $\text{CH}_2\text{Cl}_2$ /TEA to recover **1**. During the purification procedure **1** undergoes oxidation and thus after evaporation the residue, is suspended in MeOH (10 mL) and  $\text{NaBH}_4$  added (24 mg, 0.64 mmol) until the colour of the solution becomes clear yellow, and precipitation occurs. Centrifugation of the suspension from MeOH affords clean **1** (189 mg, 63%). Alternatively, after heating at  $80^\circ\text{C}$ , the reaction can be evaporated and directly reprecipitated from MeOH followed by centrifugation and filtration on celite ( $\text{CH}_2\text{Cl}_2$  100%).

$^1\text{H-NMR}$  (400 MHz,  $\text{DMSO-}d_6$ )  $\delta$  9.10 (s, 1H, NH), 8.91-8.88 (m, 1H), 8.77 (d,  $J = 8.1$  Hz, 1H), 8.50-8.48 (m, 1H), 8.00 (dd,  $J = 8.1, 1.2$  Hz, 1H), 7.78 – 7.72 (m, 2H), 7.57 – 7.52 (m, 2H), 7.51 – 7.47 (m, 1H), 7.23 – 7.18 (m, 2H), 7.06 (d,  $J = 8.9$  Hz, 2H), 6.69 (d,  $J = 8.9$  Hz, 2H), 1.35 (s, 9H), 1.13 (s, 9H).  $^{13}\text{C-NMR}$  (126 MHz,  $\text{DMSO-}d_6$ )  $\delta$  148.00, 143.83, 143.08, 139.69, 135.64, 131.09, 129.64, 128.81, 127.30, 126.69, 126.60, 126.43, 125.37, 123.95, 123.85, 123.81, 123.57, 123.11, 122.47, 122.03, 121.36, 118.85, 116.48, 114.76, 33.99, 33.60, 31.37, 31.15. IR (ATR)  $\nu$  ( $\text{cm}^{-1}$ ): 3412, 2959, 2901, 2866, 1651, 1607, 1499, 1418, 1339, 1283, 1175, 1032, 937, 816, 754, 721, 615, 544, 438. ESI-HRMS:  $[\text{M}-\text{H}]^+$  calc. for  $[\text{C}_{48}\text{H}_{33}\text{N}_2]^+$ : 469.2638; found 469.2637. Product gets oxidized to the monocation.

## 2.3 Synthesis of **1<sup>ox</sup>**

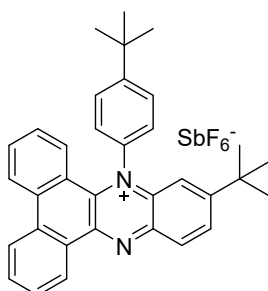

In a round bottom flask, **1** (35 mg, 0.07 mmol) was dissolved in CH<sub>2</sub>Cl<sub>2</sub> (10 mL) and AgSbF<sub>6</sub> (72 mg, 0.21 mmol) added in a single portion. After 15 min. the reaction was filtered on a 0.1 μM PTFE filter to remove Ag<sup>0</sup>, followed by washing with CH<sub>2</sub>Cl<sub>2</sub>. The resulting organic layers were then evaporated, and the residue precipitated and centrifuged 3× from Et<sub>2</sub>O (46.5 mg, 94%) samples for catalysis were further purified by 2 × filtration on celite (CH<sub>2</sub>Cl<sub>2</sub> 100%).

<sup>1</sup>H-NMR (400 MHz, ACN-*d*3) δ 9.42 – 9.38 (m, 1H), 8.84 – 8.80 (m, 1H), 8.75 – 8.71 (m, 1H), 8.66 (dd, *J* = 9.0, 0.4 Hz, 1H), 8.43 (dd, *J* = 9.0, 1.9 Hz, 1H), 8.06 – 7.88 (m, 5H), 7.64 – 7.59 (m, 2H), 7.58 (d, *J* = 1.8 Hz, 1H), 7.54 – 7.50 (m, 1H), 7.30 (ddd, *J* = 8.6, 7.1, 1.3 Hz, 1H), 1.50 (s, 9H), 1.35 (s, 9H). <sup>13</sup>C-NMR (101 MHz, ACN-*d*3) δ 162.61, 157.76, 146.89, 143.21, 138.04, 138.00, 137.72, 135.46, 133.70, 133.40, 133.28, 132.39, 132.12, 131.31, 131.06, 129.75, 129.14, 128.46, 127.71, 127.14, 126.29, 124.68, 122.67, 116.01, 37.45, 36.08, 31.36, 30.45. IR (ATR) ν (cm<sup>-1</sup>): 3067, 2963, 2878, 1601, 1504, 1450, 1360, 1177, 1107, 839, 758, 718, 652, 633, 581, 532. ESI-HRMS: [M]<sup>+</sup> calc. for [C<sub>48</sub>H<sub>33</sub>N<sub>2</sub>]<sup>+</sup>: 469.2638; found 469.2650.

### 3.0 Photophysical and electrochemical characterization

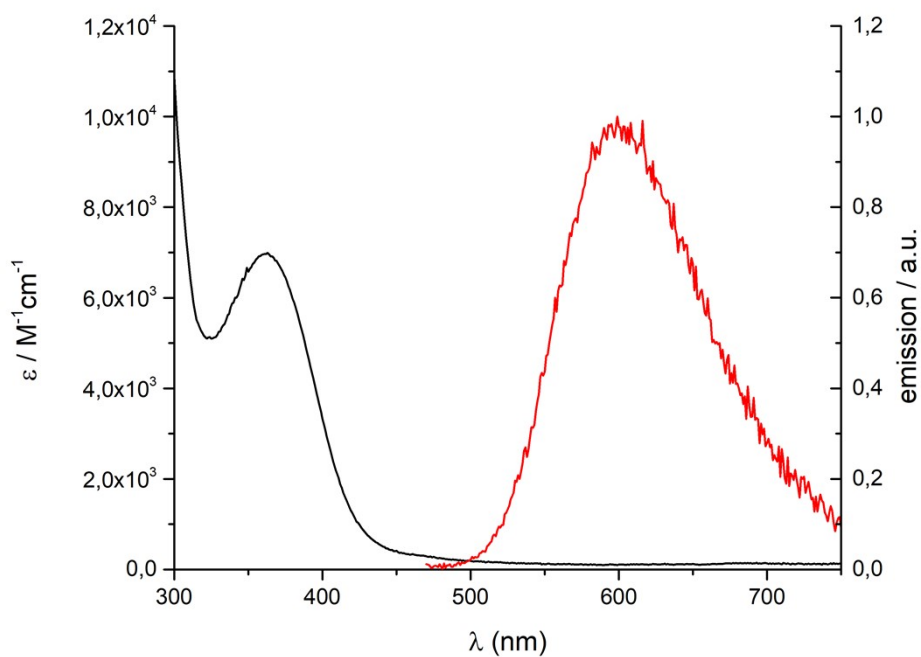

**Figure S1.** Normalized absorption and emission spectra of **1** in DMF.

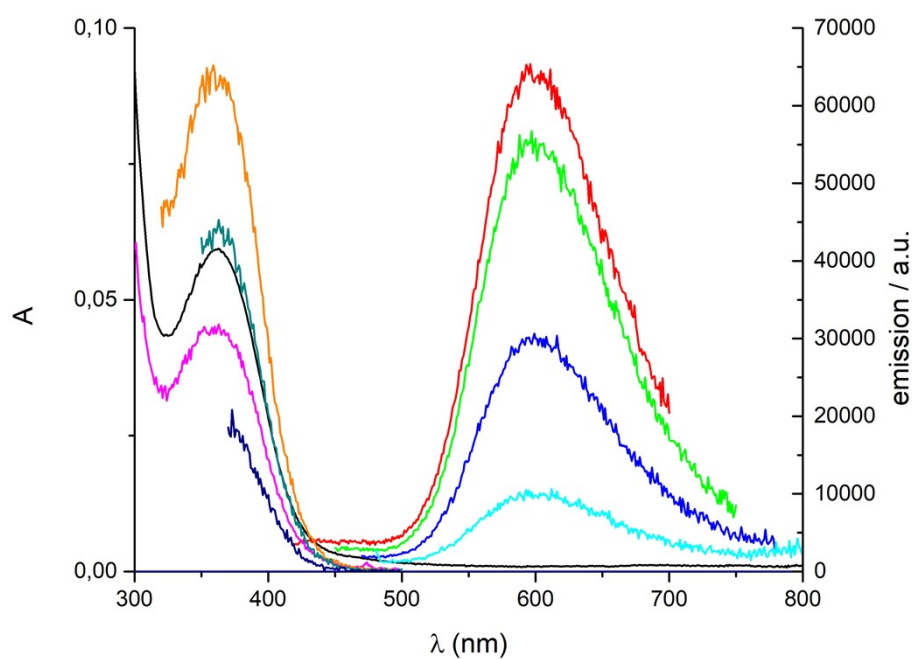

**Figure S2.** Absorption (black), emission (red, green, blue and cyan  $\lambda_{\text{exc}} = 360, 380, 400, 420$  nm) and excitation (magenta, orange, dark green and navy blue  $\lambda_{\text{em}} = 550, 600, 650, 700$  nm) spectra of **1** ( $8 \times 10^{-6}$  M) in DMF.

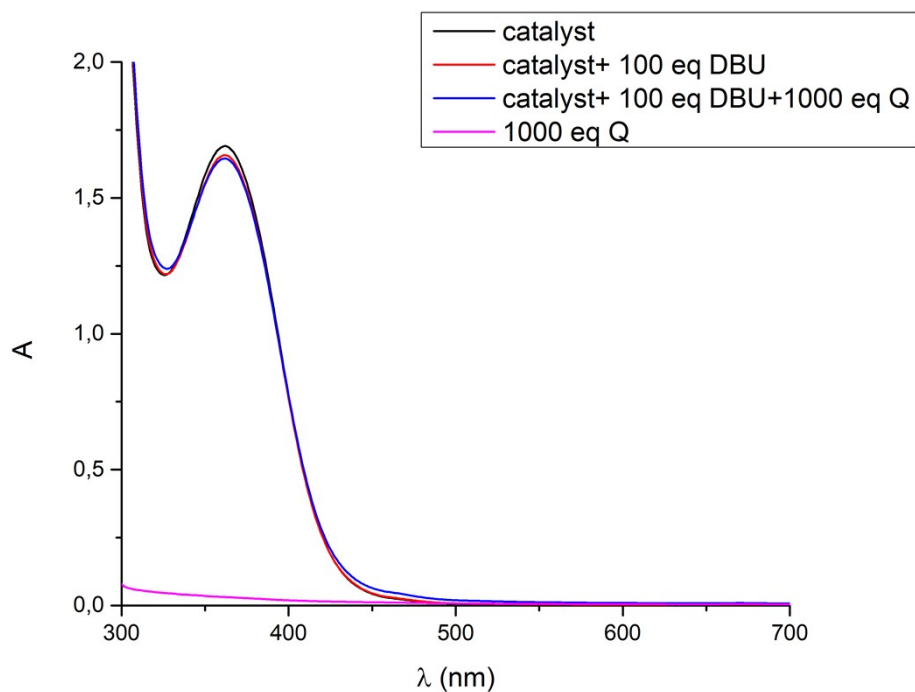

**Figure S3.** Absorption of **1** ( $2.5 \times 10^{-4}$  M), **DBU** (0.025 M), **4a** (0.25 M) and relative mixtures in DMF.

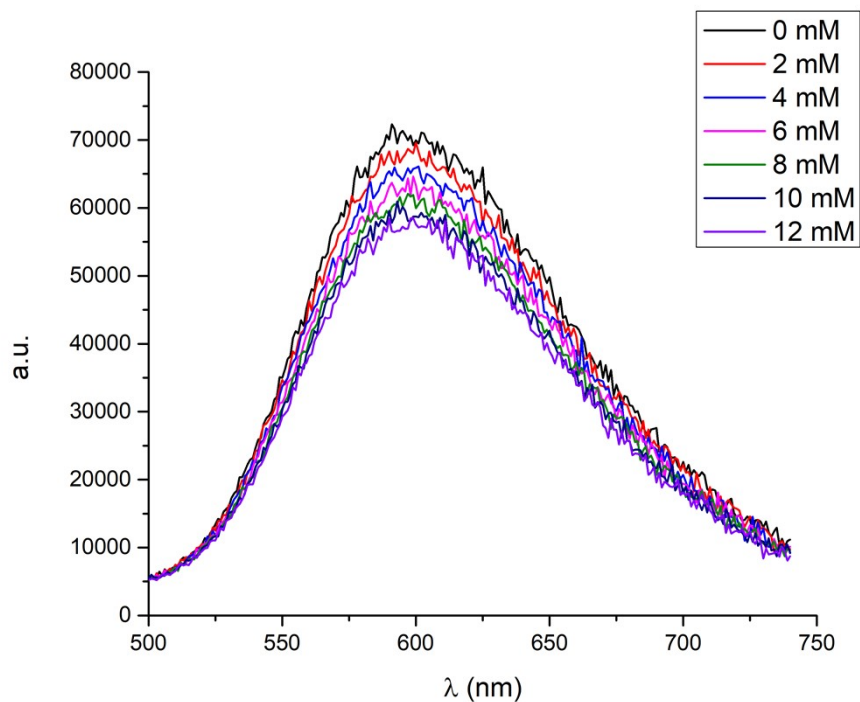

**Figure S4.** Stern-Volmer quenching study of **1** ( $1.0 \times 10^{-5}$  M) in DMF upon the addition of **4a** ( $2\text{-}12 \times 10^{-3}$  M) in presence of **DBU** ( $1.0 \times 10^{-3}$  M).



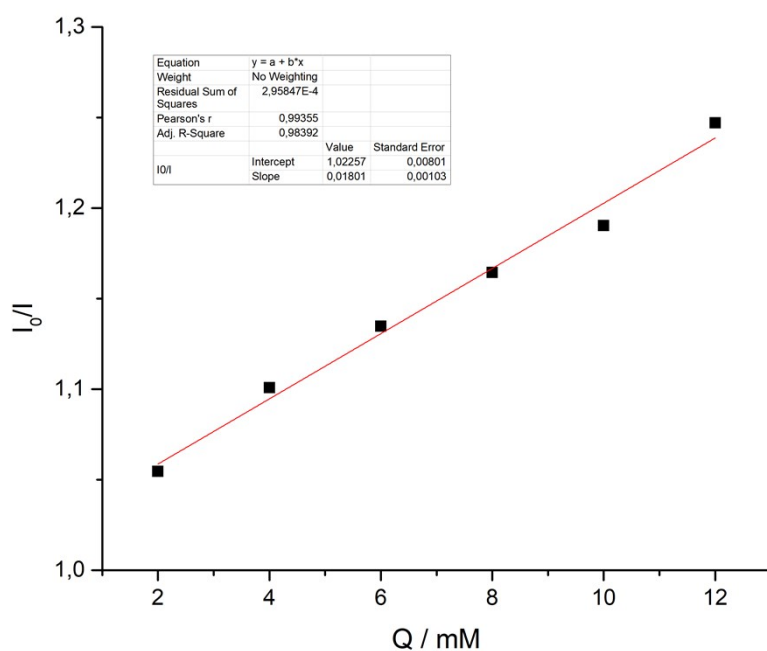

**Figure S5.** Stern-Volmer quenching study of **1** ( $1.0 \times 10^{-5}$  M) in DMF upon the addition of **4a** ( $2\text{-}12 \times 10^{-3}$  M) in presence of DBU ( $1.0 \times 10^{-3}$  M).  $K_q = 5.1 \times 10^9 \text{ M}^{-1} \times \text{s}^{-1}$ .

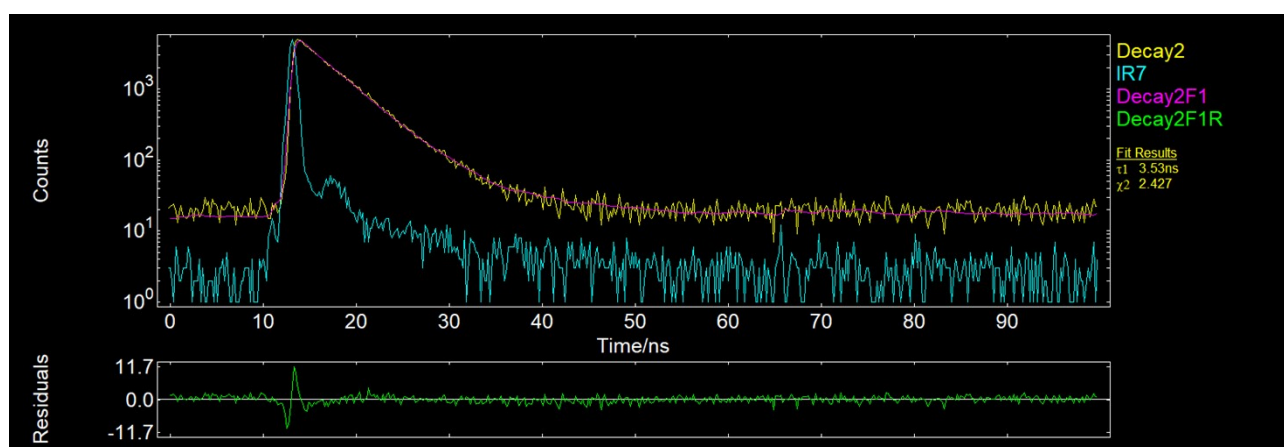

**Figure S6.** Emission lifetime of **1** ( $8 \times 10^{-6}$  M) in DMF. The yellow curve corresponds to the sample fluorescence decay, the blue curve corresponds to the instrument response function and the magenta curve corresponds to the best fit, with their respective residuals (green line).

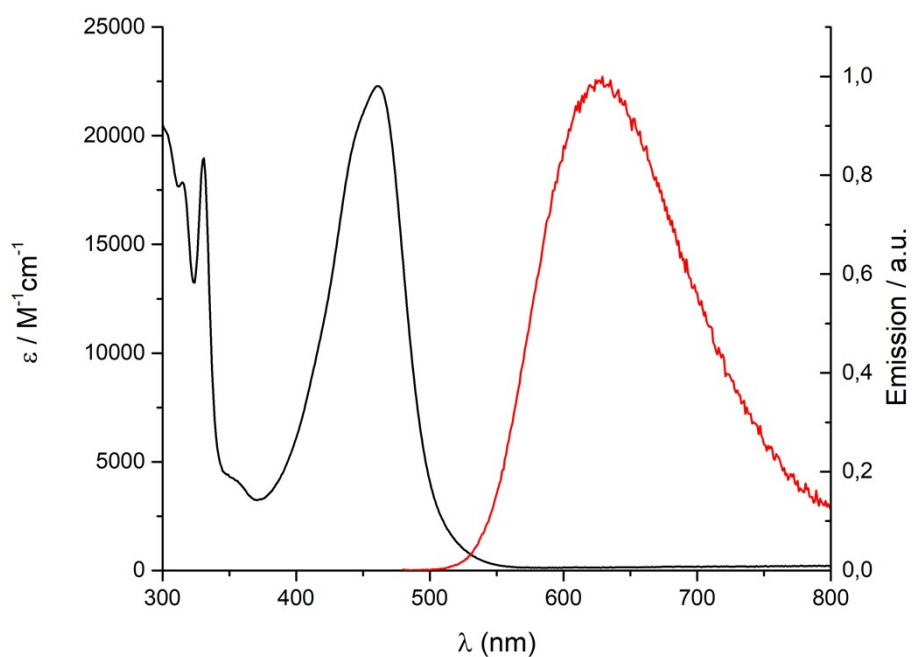

**Figure S7.** Normalized absorption and emission spectra of  $\mathbf{1}^{\text{ox}}$  in  $\text{CH}_2\text{Cl}_2$ .

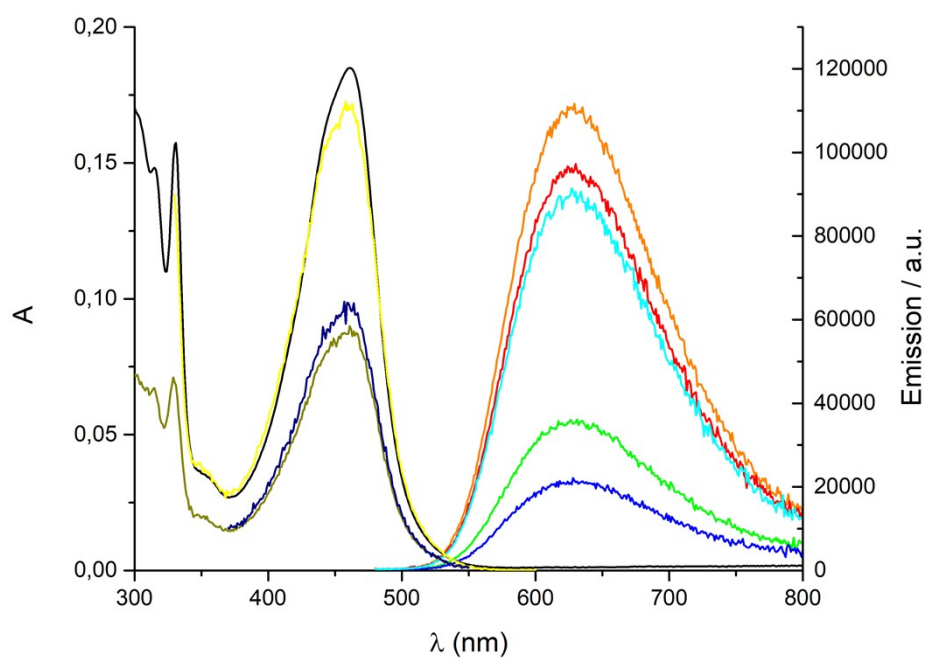

**Figure S8.** Absorption (black), emission (orange, red, cyan, green and blue  $\lambda_{\text{exc}} = 463, 330, 440, 400$  and  $360$  nm) and excitation (yellow, navy blue and brown  $\lambda_{\text{em}} = 630, 575$  and  $700$  nm) spectra of  $\mathbf{1}^{\text{ox}}$  ( $8.3 \times 10^{-6}$  M) in  $\text{CH}_2\text{Cl}_2$ .

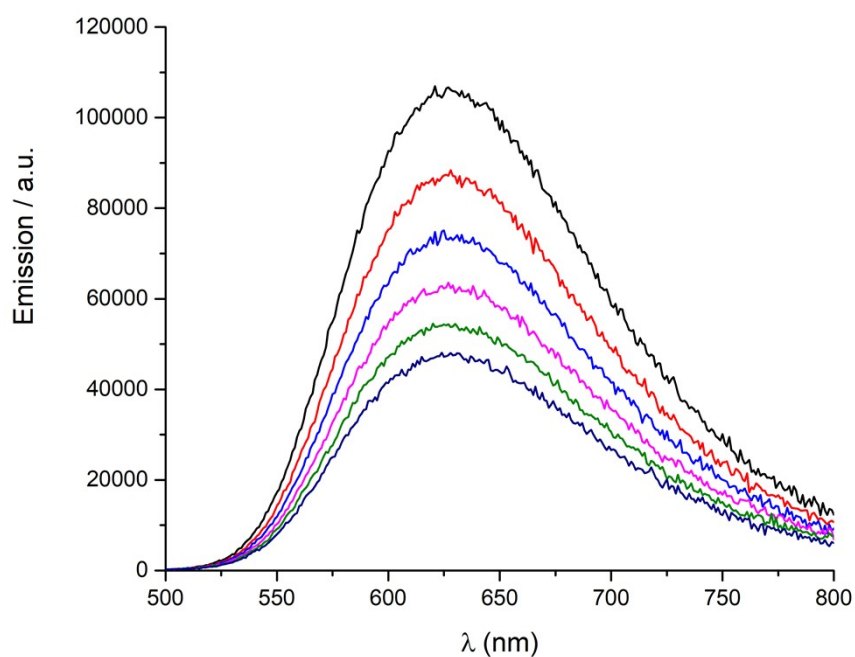

**Figure S9.** Stern-Volmer quenching study of  $1^{ox}$  ( $8.3 \times 10^{-6}$  M) in  $CH_2Cl_2$  upon the addition of  $6a$  ( $8.3-40.0 \times 10^{-3}$  M).

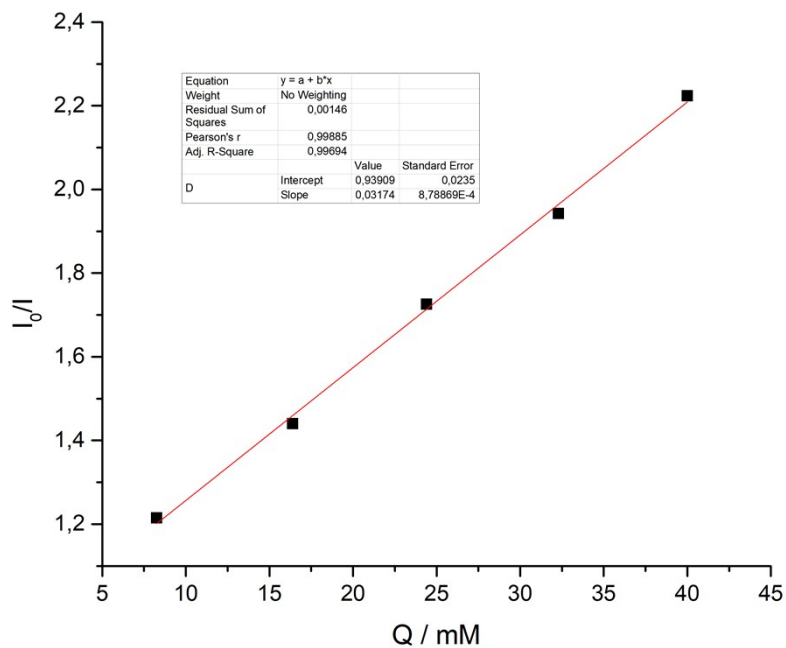

**Figure S10.** Stern-Volmer quenching study of  $1^{ox}$  ( $8.3 \times 10^{-6}$  M) in  $CH_2Cl_2$  upon the addition of  $6a$  ( $8.3-40.0 \times 10^{-3}$  M).

$K_q = 8.5 \times 10^9 \text{ M}^{-1} \times \text{s}^{-1}$ .

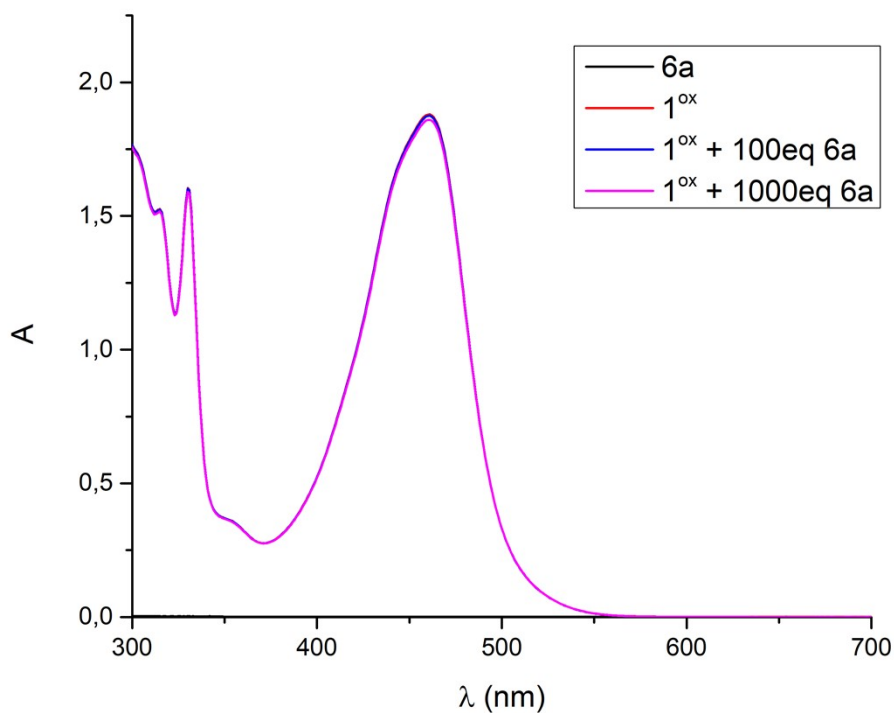

**Figure S11.** Absorption of 1<sup>ox</sup> ( $1.0 \times 10^{-4}$  M), 6a (0.01 M) and relative mixtures in CH<sub>2</sub>Cl<sub>2</sub>.

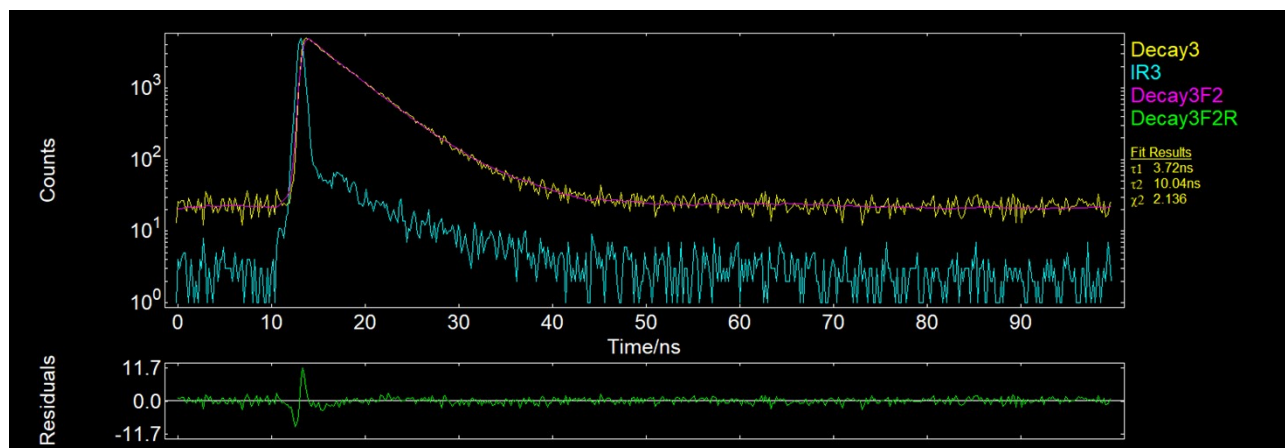

**Figure S12.** Emission lifetime of 1<sup>ox</sup> ( $8.3 \times 10^{-6}$  M) in CH<sub>2</sub>Cl<sub>2</sub>. The yellow curve corresponds to the sample fluorescence decay, the blue curve corresponds to the instrument response function and the magenta curve corresponds to the best fit, with their respective residuals (green line).

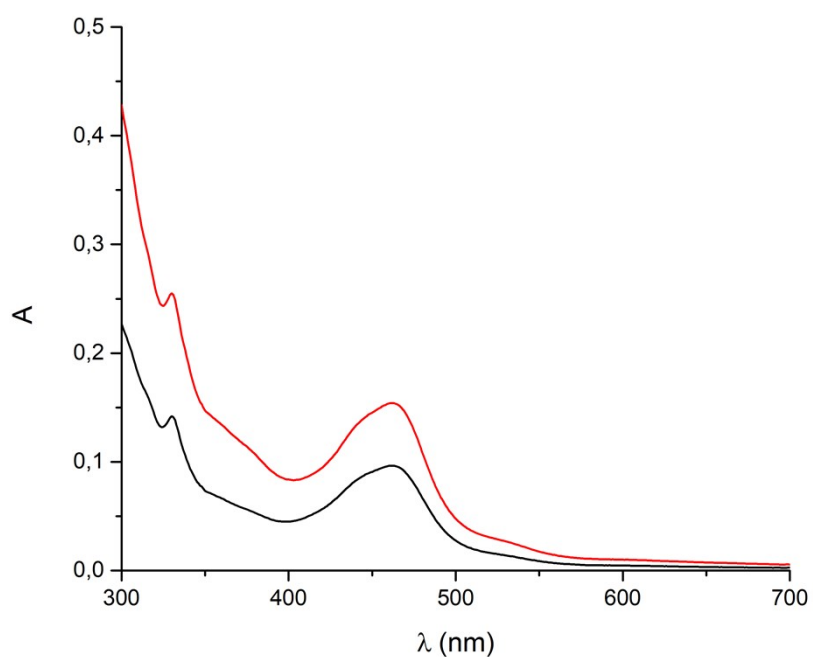

**Figure S13.** Absorption of **1** [ $1.67 \times 10^{-5}$  M] (black), and [ $3.33 \times 10^{-5}$  M] (red) after 2h irradiation under air in ODCB [0.01 M].

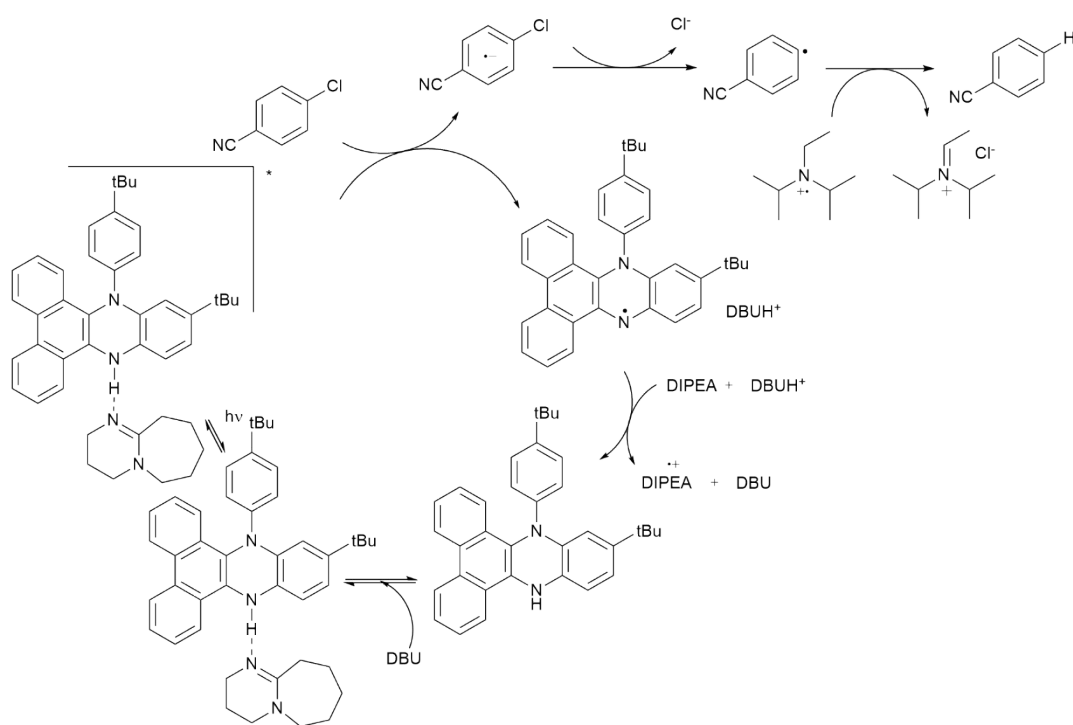

**Figure S14.** Proposed mechanism hypothesis for the catalytic activity of **1**.

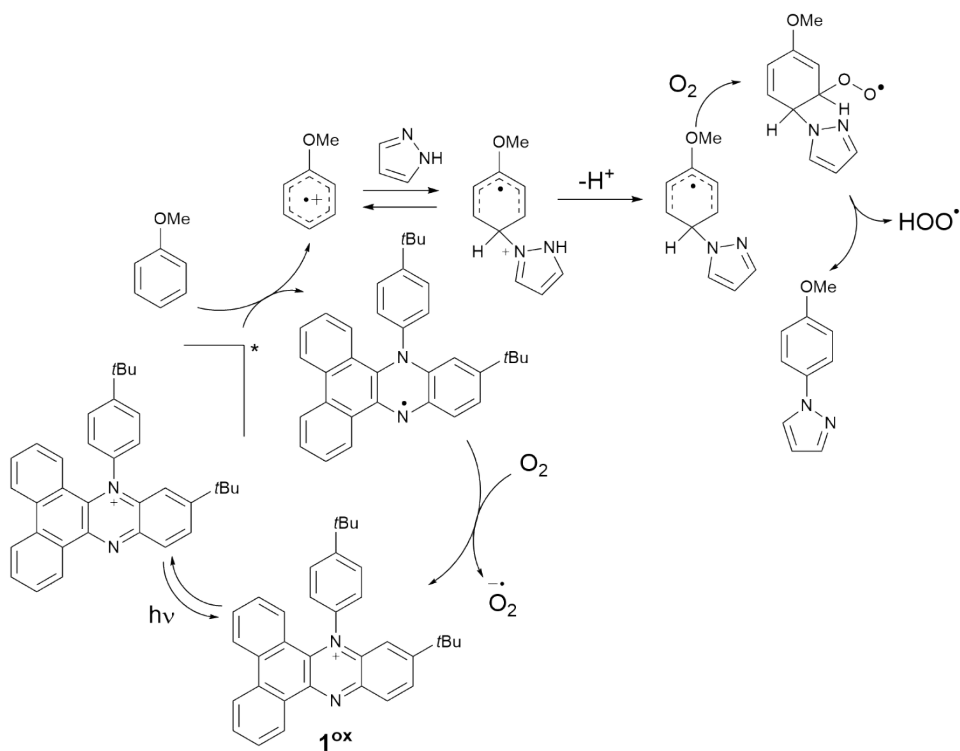

**Figure S15.** Proposed mechanism hypothesis for the catalytic activity of **1<sup>ox</sup>**.

## 4.0 Electrochemical characterization

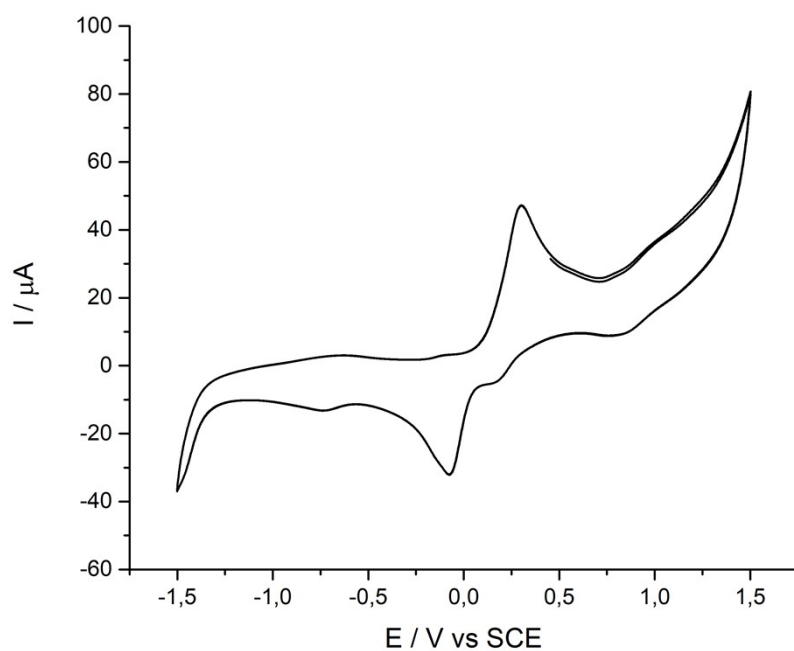

**Figure S16.** Cyclic voltammograms of **1** (1 mM), in DMF. Scan rates: 0.05 V s<sup>-1</sup> (black line), TBAPF<sub>6</sub> (0.1 M) is used as a supporting electrolyte.

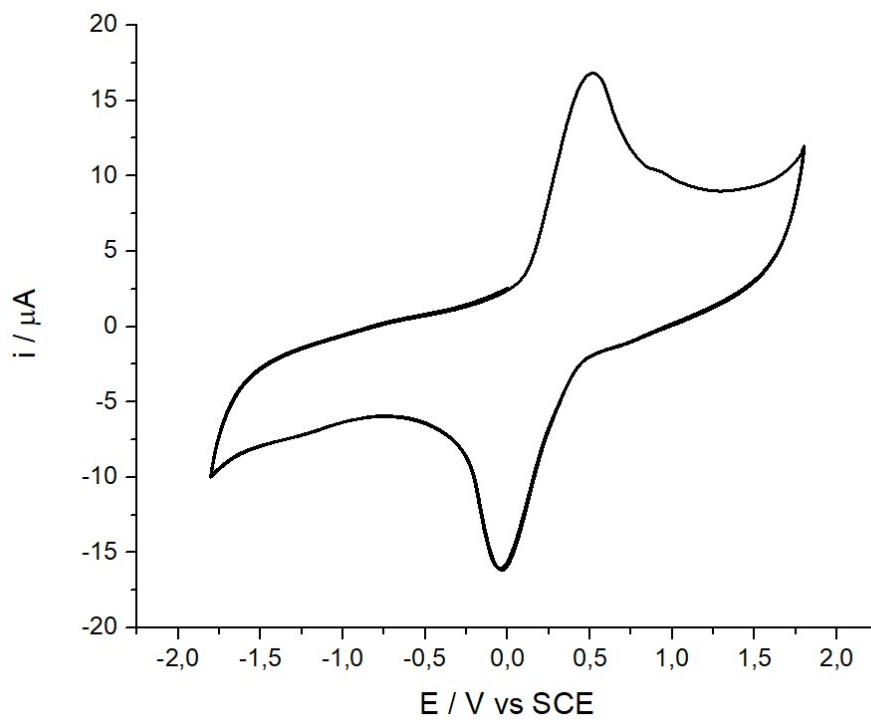

**Figure S17.** Cyclic voltammograms of **1** (1 mM), in CH<sub>2</sub>Cl<sub>2</sub>. Scan rates: 0.1 V s<sup>-1</sup> (black line), TBAPF<sub>6</sub> (0.1 M) is used as a supporting electrolyte.

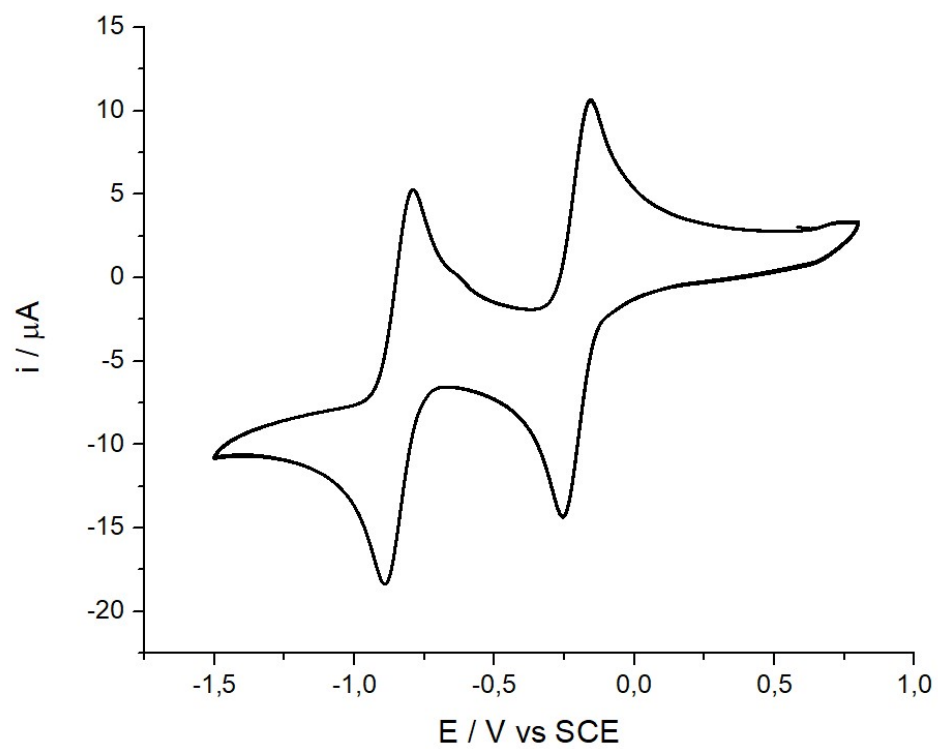

**Figure S18.** Cyclic voltammograms of **1<sup>ox</sup>** (1 mM), in  $\text{CH}_2\text{Cl}_2$ . Scan rates:  $0.05 \text{ V s}^{-1}$  (black line),  $\text{TBAPF}_6$  (0.1 M) is used as a supporting electrolyte.



## 5.0 Photocatalytic Reaction optimization and entries

### 5.1 Reduction reaction optimization and dehalogenation reactions

Reactions performed on 4-chlorobenzonitrile (0.05 mmol) as substrate [0.1 M]. Yields determined by NMR using 0.05 mmol of trichloroethylene as internal standard.

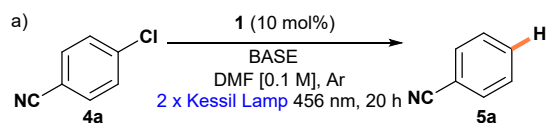

| entry | conditions  | solvent    | T (h)     | Base (vs 4a)                | yield           |
|-------|-------------|------------|-----------|-----------------------------|-----------------|
| 1     | /           | DMF        | 20        | Dipea 1 eq.                 | 39%             |
| 2     | /           | DMF        | 20        | Dipea 10 eq                 | 46%             |
| 3     | /           | DMF        | 20        | DBU 10 eq                   | 84%             |
| 4     | /           | DMF        | 20        | DBU 15 eq                   | 70%             |
| 5     | /           | DMF        | 20        | DBU 5 eq                    | 26%             |
| 6     | /           | <b>DMF</b> | <b>20</b> | <b>DBU 10 eq-Dipea 1 eq</b> | <b>&gt;95%</b>  |
| 7     | no catalyst | DMF        | 20        | DBU 10 eq- Dipea 1 eq       | 0% <sup>a</sup> |
| 8     | dark        | DMF        | 20        | DBU 10 eq-Dipea 1 eq        | 0% <sup>a</sup> |
| 9     | In air      | DMF        | 20        | DBU 10 eq-Dipea 1 eq        | 15%             |

Table S1. Optimization of reaction conditions with catalyst **1**.

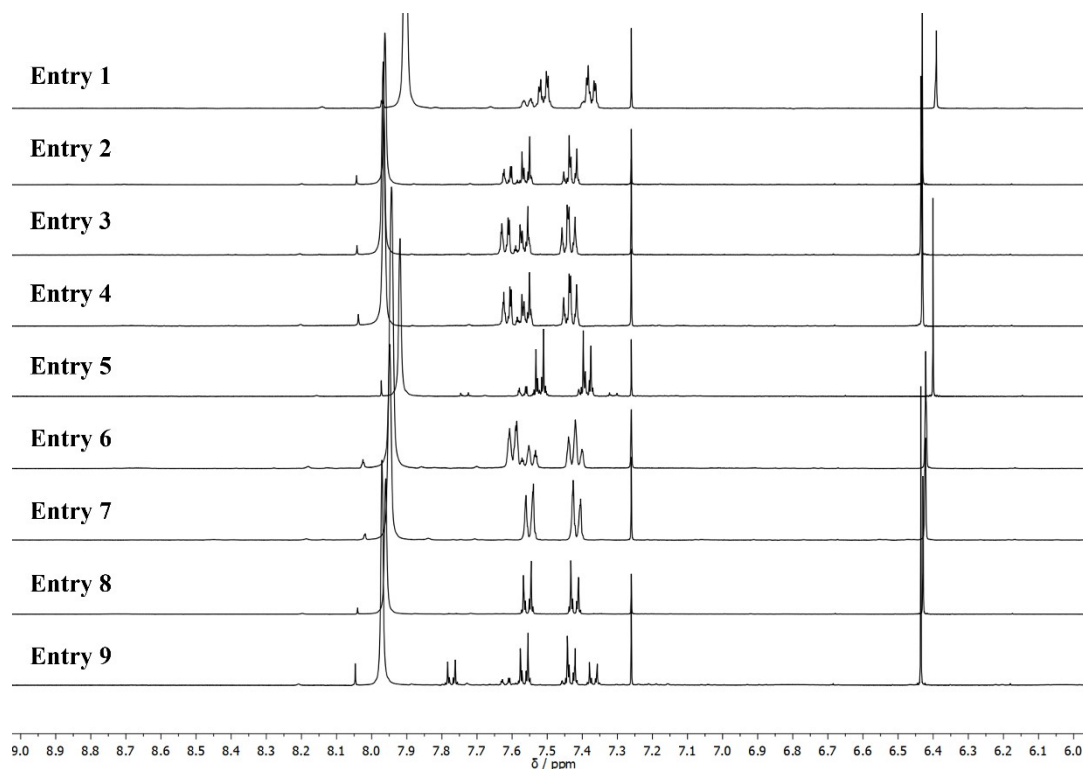

Figure S19. 400 MHz <sup>1</sup>H-NMR of entries 1-9 with **1**. Zoom on the aromatic region.

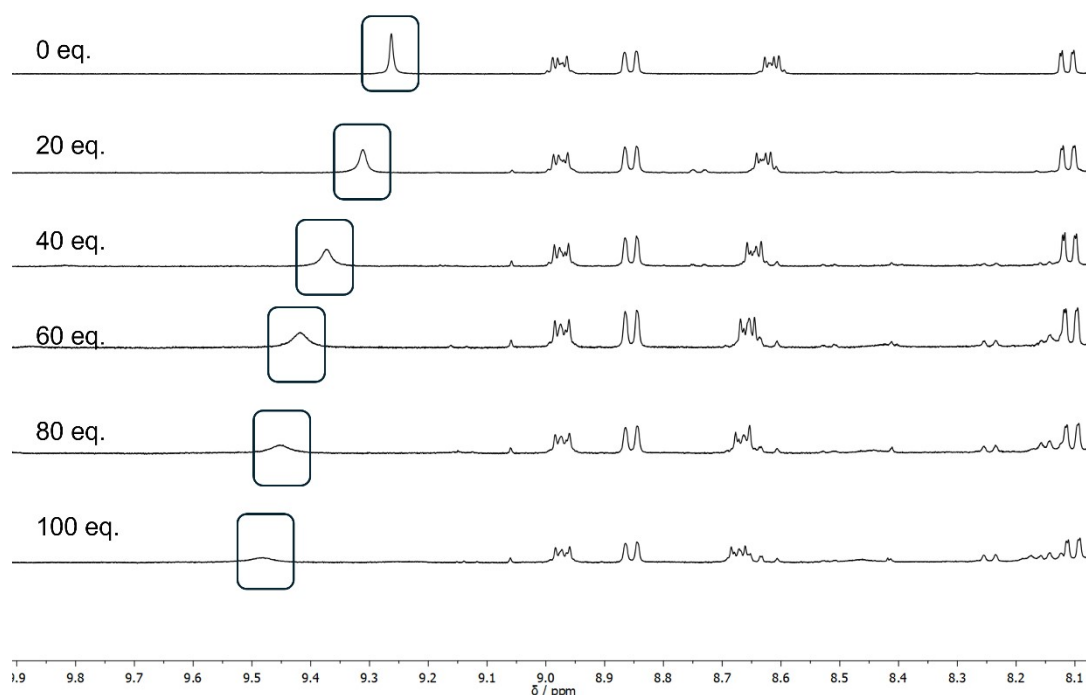

**Figure S20.** 400 MHz  $^1\text{H-NMR}$  titration of **1** [0.01 M] in  $\text{DMF-}d_7$  with increasing amounts of DBU. Zoom on the aromatic region.

## 5.2 General procedure for photocatalytic reduction experiments

A 10 mL Schlenk tube equipped with magnetic stirring bar was charged the photocatalyst **1** (10 mol%, 0.005 mmol, 2.4 mg), DBU (75  $\mu\text{L}$ , 0.5 mmol), DIPEA (8.7  $\mu\text{L}$ , 0.05 mmol) and aryl halide (1 equiv., 0.05 mmol). Subsequently, DMF (0.5 mL) was introduced, the reaction mixture was thoroughly degassed via 3 cycles of freeze-pump-thaw, and the vessel refilled with argon. The Schlenk was irradiated for 20 hours through two 456 nm Kessil Lamp (each on opposite sides, ca. 4 cm distance from the flask). The temperature was kept at around 35°C by using a fan. After 20 h the reactions were quenched with 2M HCl (2 mL) and the reaction extracted 3  $\times$  with  $\text{Et}_2\text{O}$  (2 mL) and the organic layers evaporated. NMR yield was obtained adding 0.05 mmol of trichloroethylene to the reaction crude in  $\text{CDCl}_3$ .

### Dehalogenation Scope

| entry | Substrate                         | solv | T (h) | yield |
|-------|-----------------------------------|------|-------|-------|
| 1     | 4-Br-Biphenyl ( <b>4c</b> )       | DMF  | 20    | 47%   |
| 2     | 4-Cl-Acetophenone ( <b>4b</b> )   | DMF  | 20    | 86%   |
| 3     | 1-Cl-Naphthalene ( <b>4e</b> )    | DMF  | 20    | 84%   |
| 4     | 4-Cl-Methylbenzoate ( <b>4d</b> ) | DMF  | 20    | >95%  |

**Table S2.** Dehalogenation Scope using **1** as catalyst with conditions from paragraph 5.2. NMR yields obtained with trichloroethylene (TCE) as internal standard.

### 5.3 Oxidation reaction optimization

Reactions performed on anisole (0.05 mmol) as substrate [0.1 M]. Yields determined by NMR using 0.05 mmol of trichloroethylene as internal standard.

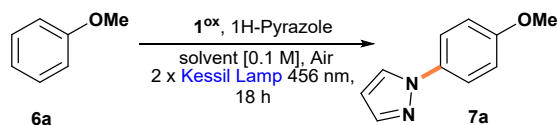

| Entry | Catalyst        | Solvent     | T (h)      | Conditions  | p yield    | o yield    | Total yield                |
|-------|-----------------|-------------|------------|-------------|------------|------------|----------------------------|
| 1     | 10% cat         | DCE         | 18h        | /           | 60%        | 13%        | 73%                        |
| 2     | 10% cat         | DCE         | 18h        | TEMPO 10%   | 56%        | 13%        | 69%                        |
| 3     | 10% cat         | DCE         | 18h        | TEMPO 20%   | 48%        | 11%        | 59%                        |
| 4     | 10% cat         | odcb        | 18h        | /           | 75%        | 17%        | 92%                        |
| 5     | 0% cat          | odcb        | 18h        | /           | 0%         | 0%         | 0%                         |
| 6     | 10% cat         | odcb        | 18h        | dark        | 0%         | 0%         | 0%                         |
| 7     | 5% cat          | odcb        | 18h        | /           | 73%        | 15%        | 88%                        |
| 8     | 5% cat          | odcb        | 18h        | 525nm 1x    | 54%        | 9%         | 63%                        |
| 9     | <b>2.5% cat</b> | <b>odcb</b> | <b>18h</b> | /           | <b>72%</b> | <b>16%</b> | <b>87% (80%) o:p 1:4.5</b> |
| 10    | 1.0% cat        | odcb        | 18h        | /           | 60%        | 13%        | 73% o:p 1:4.6              |
| 11    | 0.5% cat        | odcb        | 18h        | /           | 55%        | 13%        | 68% o:p 1:4.2              |
| 12    | 2.5% cat        | odcb        | 18h        | Under Argon | 10%        | 5%         | 15% o:p 1:2.0              |
| 13    | 2.5% <b>1</b>   | odcb        | 18h        | /           | 19%        | 4%         | 24% o:p 1:4.8              |
| 14    | 10% <b>1</b>    | odcb        | 18h        | /           | 32%        | 8%         | 40% o:p 1:4.75             |

Table S3. Optimization of reaction conditions using **1<sup>ox</sup>** as catalyst.

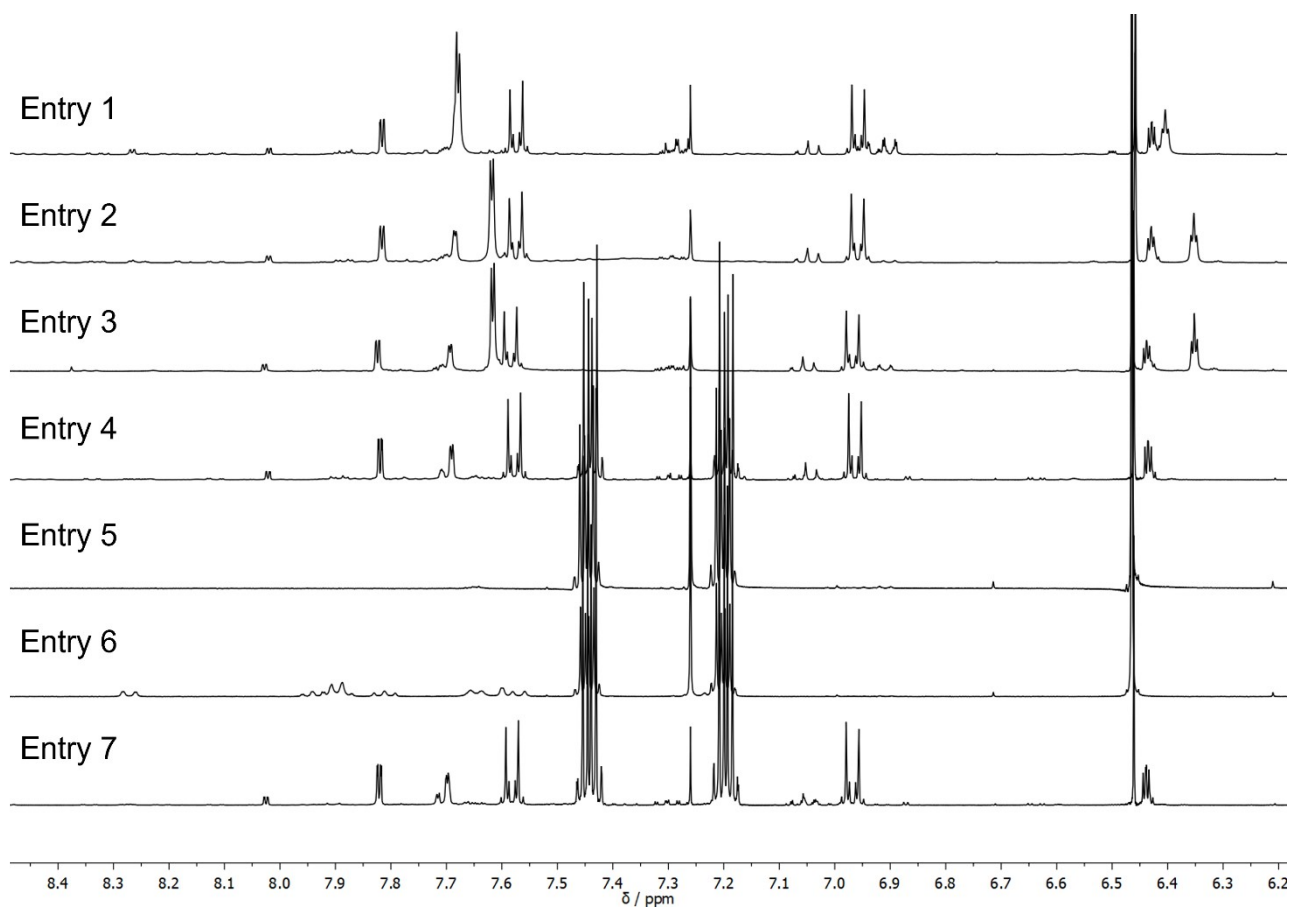

Figure S21. 400 MHz <sup>1</sup>H-NMR of entries 1-7 with **1<sup>ox</sup>**. Zoom on the aromatic region.

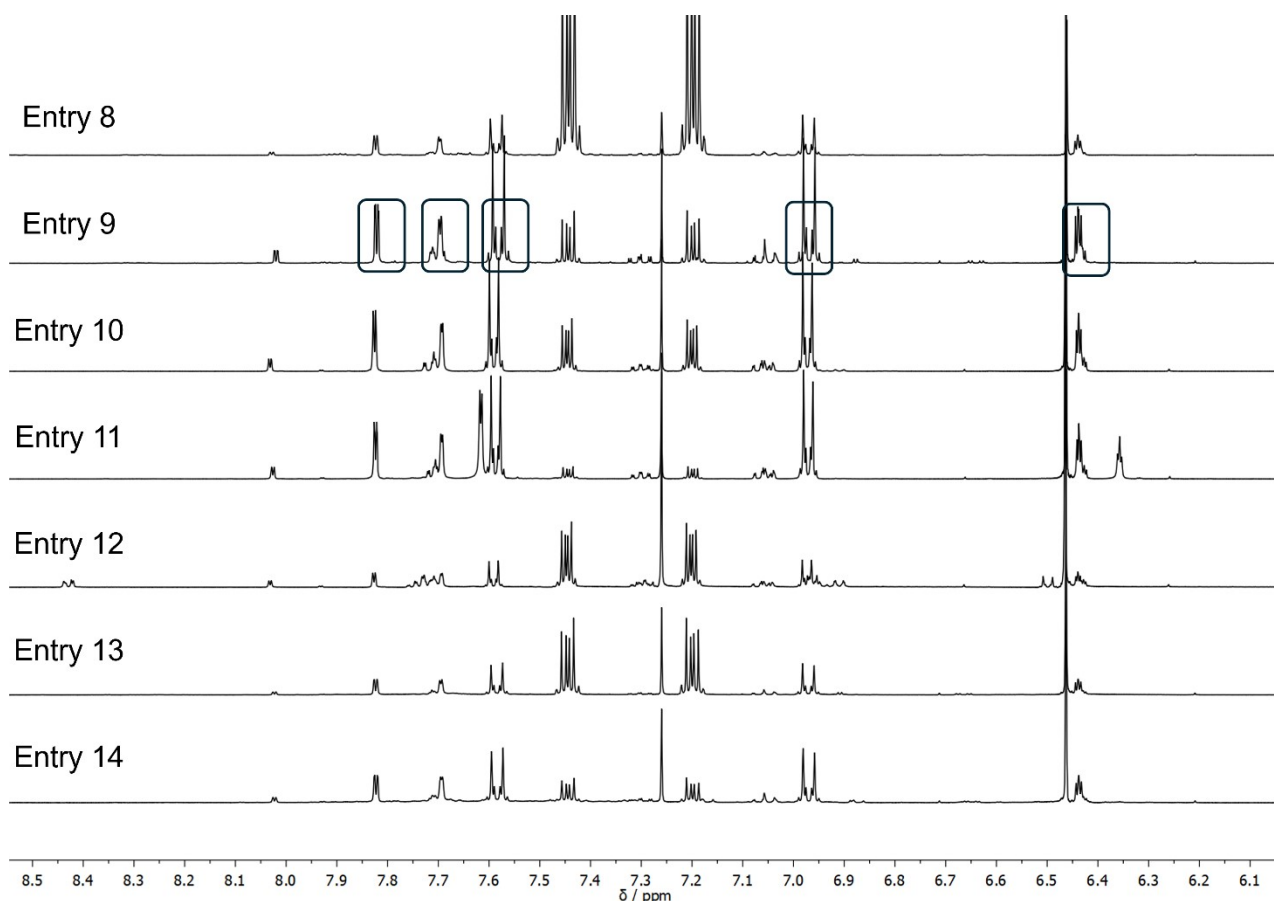

**Figure S22.** 400 MHz  $^1\text{H}$ -NMR of entries 8-14 with  $1^{\text{ox}}$ . Zoom on the aromatic region. Blue boxes highlight the *para* product signals.

#### 5.4 General procedure for photocatalytic oxidation experiments

A 10 mL Schlenk tube equipped with magnetic stirring bar was charged the photocatalyst  $1^{\text{ox}}$  (2.5 mol%, 0.00125 mmol, 0.9 mg), anisole (5,4  $\mu\text{L}$ , 0.05 mmol) and pyrazole (0.1 mmol, 2 eq.). Subsequently, ODCB (0.5 mL) was introduced. The Schlenk was irradiated for 18 hours under air through two 456 nm Kessil Lamp (each on opposite sides, ca. 4 cm distance from the flask). The temperature was kept at around 35°C by using a fan. After 18 h the reactions were evaporated under reduced pressure. NMR yield was obtained adding 0.05 mmol of trichloroethylene to the reaction crude in  $\text{CDCl}_3$ .

#### 5.5 Oxidation reaction scope

All reactions were carried out according with the general procedure 5.4.

#### 1-(4-methoxyphenyl)-1H-pyrazole, 1-(2-methoxyphenyl)-1H-pyrazole (7a)

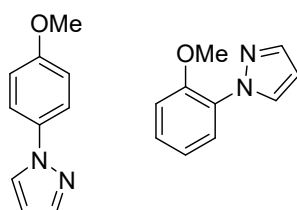

Prepared according to the general procedure using anisole **6a** (0.05 mmol, 5.4  $\mu$ L), and pyrazole (0.1 mmol, 6.8 mg). The product **7a** was purified by flash chromatography (PE 100% to  $\text{CH}_2\text{Cl}_2$  100%) to afford a pale-yellow oil composed by an inseparable mixture of *para* and *ortho* isomers in a ratio of 4.5:1. NMR Yield: 87%, Isolated yield: 80%, 7.0 mg. The characterization data matched with the reported one.<sup>1</sup>

*para*:  $^1\text{H-NMR}$  (400 MHz,  $\text{CDCl}_3$ )  $\delta$  7.83 (dd,  $J = 2.4, 0.6$  Hz, 1H), 7.69 (d,  $J = 1.8$  Hz, 1H), 7.59 (d,  $J = 9.2$  Hz, 2H), 6.97 (d,  $J = 9.1$  Hz, 2H), 6.44 (dd,  $J = 2.4, 1.9$  Hz, 1H), 3.84 (s, 3H).

*ortho*:  $^1\text{H-NMR}$  (400 MHz,  $\text{CDCl}_3$ )  $\delta$  8.03 (dd,  $J = 2.4, 0.6$  Hz, 1H), 7.72 – 7.70 (m, 3H), 7.32 – 7.28 (m, 1H), 7.09 – 7.02 (m, 1H), 6.43 – 6.42 (m, 1H), 3.88 (s, 3H).

$^{13}\text{C-NMR}$  (126 MHz,  $\text{CDCl}_3$ )  $\delta$  158.38, 140.74, 140.18, 134.14, 131.71, 128.20, 127.00, 125.46, 121.29, 121.08, 114.65, 112.40, 107.29, 106.28, 56.07, 55.70. Some *ortho* signals not visible due to low concentration.

### 1-(4-phenoxyphenyl)-1H-pyrazole and 1-(2-phenoxyphenyl)-1H-pyrazole (**7b**)

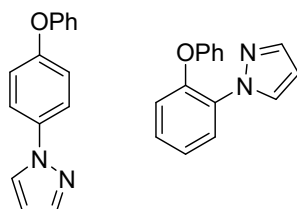

Prepared according to the general procedure using diphenylether **6b** (0.05 mmol, 7.9  $\mu$ L), and pyrazole (0.1 mmol, 6.8 mg). The product **7b** was purified by flash chromatography (PE 100% to  $\text{CH}_2\text{Cl}_2$  100%) to afford a yellowish solid composed by an inseparable mixture of *para* and *ortho* isomers in a ratio of 6.5:1. NMR Yield: >95%, Isolated yield: 89%, 10.8 mg. The characterization data matched with the reported one.<sup>1</sup>

*para*:  $^1\text{H-NMR}$  (400 MHz,  $\text{CDCl}_3$ )  $\delta$  7.87 (dd,  $J = 2.5, 0.6$  Hz, 1H), 7.72 (d,  $J = 1.3$  Hz, 1H), 7.64 (d,  $J = 9.1$  Hz, 2H), 7.36 (dd,  $J = 8.6, 7.4$  Hz, 2H), 7.16 – 7.07 (m, 3H), 7.06 – 7.02 (m, 2H), 6.46 (dd,  $J = 2.4, 1.8$  Hz, 1H).

*ortho*:  $^1\text{H NMR}$  (400 MHz,  $\text{CDCl}_3$ )  $\delta$  8.08 (dd,  $J = 2.5, 0.6$  Hz, 1H), 7.92 – 7.88 (m, 1H), 7.68 (d,  $J = 2.2$  Hz, 1H), 7.33 – 7.28 (m, 3H), 7.27 (d,  $J = 2.3$  Hz, 1H), 7.26 – 7.24 (m, 1H), 7.01 – 6.94 (m, 2H), 6.37 (dd,  $J = 2.5, 1.8$  Hz, 1H). One signal overlapped with *para* derivative.

$^{13}\text{C-NMR}$  (101 MHz,  $\text{CDCl}_3$ )  $\delta$  157.23, 155.89, 141.08, 140.60, 136.05, 131.33, 130.00, 129.87, 127.98, 126.99, 125.46, 124.65, 123.66, 123.35, 121.07, 120.72, 119.79, 118.99, 118.29, 107.63, 106.95. Some *ortho* signals not visible due to low concentration.

### 1-([1,1'-biphenyl]-4-yl)-1H-pyrazole (**7c**)

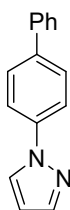

Prepared according to the general procedure using biphenyl **6c** (0.05 mmol, 7.7 mg), and pyrazole (0.1 mmol, 6.8 mg). The product **7c** was purified by flash chromatography (PE 100% to CH<sub>2</sub>Cl<sub>2</sub> 100%) to afford a beige solid. NMR Yield: 64%, Isolated yield: 64%, 7.0 mg. The characterization data matched with the reported one.<sup>1</sup>

<sup>1</sup>H-NMR (400 MHz, CDCl<sub>3</sub>) δ 7.97 (d, *J* = 2.5 Hz, 1H), 7.79 – 7.75 (m, 3H), 7.69 (d, *J* = 8.8 Hz, 2H), 7.62 (dd, *J* = 8.3, 1.2 Hz, 2H), 7.46 (t, *J* = 7.5 Hz, 2H), 7.37 (t, *J* = 7.4 Hz, 1H), 6.50 – 6.49 (m, 1H).

<sup>13</sup>C-NMR (101 MHz, CDCl<sub>3</sub>) δ 141.32, 140.26, 139.53, 139.50, 129.02, 128.21, 127.64, 127.11, 126.85, 119.61, 107.85.

### 1-(2-methoxynaphthalen)-1H-Pyrazole (7d)

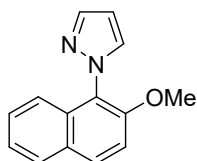

Prepared according to the general procedure using 2-methoxynaphthalene **6d** (0.05 mmol, 7.9 mg), and pyrazole (0.1 mmol, 6.8 mg). The product **7d** was purified by flash chromatography (PE 100% to CH<sub>2</sub>Cl<sub>2</sub> 100%) to afford a faint yellow oil. NMR Yield: 52%, Isolated yield: 40%, 4.5 mg. The characterization data matched with the reported one.<sup>2</sup>

<sup>1</sup>H-NMR (499 MHz, CDCl<sub>3</sub>-d) δ 7.96 (d, *J* = 9.1 Hz, 1H), 7.87 (d, *J* = 1.9 Hz, 1H), 7.83 (d, *J* = 8.1 Hz, 1H), 7.66 (dd, *J* = 2.3, 0.6 Hz, 1H), 7.45 – 7.36 (m, 3H), 7.24 (d, *J* = 8.4 Hz, 1H), 6.55 (t, *J* = 2.1 Hz, 1H), 3.89 (s, 3H).

<sup>13</sup>C-NMR (126 MHz, CDCl<sub>3</sub>) δ 152.75, 140.68, 133.10, 132.37, 130.83, 128.96, 127.96, 127.81, 124.49, 122.23, 113.69, 106.55, 106.08, 57.01.

### 1-(4-methoxy-2-bromophenyl)-1H-Pyrazole (7e)

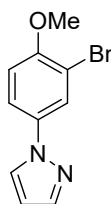

Prepared according to the general procedure using 2-bromoanisole **6e** (0.05 mmol, 6.2 μL), and pyrazole (0.1 mmol, 6.8 mg). The product **7e** was purified by flash chromatography (PE 100% to CH<sub>2</sub>Cl<sub>2</sub> 100%) to afford a faint yellow oil. NMR Yield: 38%, Isolated yield: 38%, 4.8 mg. The characterization data matched with the reported one.<sup>3</sup>

<sup>1</sup>H-NMR (400 MHz, CDCl<sub>3</sub>) δ 7.91 (d, *J* = 2.7 Hz, 1H), 7.84 – 7.81 (m, 1H), 7.70 (d, *J* = 1.4 Hz, 1H), 7.60 (dd, *J* = 8.9, 2.7 Hz, 1H), 6.96 (d, *J* = 8.9 Hz, 1H), 6.47 – 6.43 (m, 1H), 3.93 (s, 3H).

<sup>13</sup>C-NMR (101 MHz, CDCl<sub>3</sub>) δ 154.72, 141.18, 134.60, 126.94, 124.85, 119.55, 112.27, 112.25, 107.77, 56.72.

### 1-(4-methoxyphenyl)-3,5-dimethyl-1H-pyrazole, 1-(2-methoxyphenyl)-3,5 dimethyl-1H-pyrazole (7f)

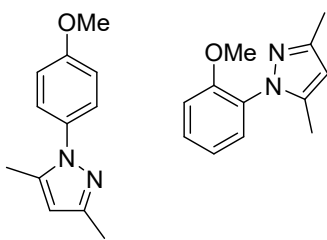

Prepared according to the general procedure using anisole **6a** (0.05 mmol, 5.4  $\mu$ L), and 2,5-dimethylpyrazole (0.1 mmol, 9.6 mg). The product **7f** was purified by flash chromatography (PE 100% to  $\text{CH}_2\text{Cl}_2$  100%) to afford a faint yellow solid composed by an inseparable mixture of *para* and *ortho* isomers in a ratio of 4:1. NMR Yield: 89%, Isolated yield: 52%, 5.3 mg. The characterization data matched with the reported one.<sup>1</sup>

*Para*:  $^1\text{H-NMR}$  (400 MHz,  $\text{CDCl}_3$ )  $\delta$  7.32 (d,  $J = 9.0$  Hz, 2H), 6.95 (d,  $J = 9.0$  Hz, 2H), 5.96 (s, 1H), 3.84 (s, 3H), 2.29 (s, 3H), 2.24 (s, 3H).

*Ortho*:  $^1\text{H-NMR}$  (400 MHz,  $\text{CDCl}_3$ )  $\delta$  7.38 (ddd,  $J = 8.3, 7.5, 1.7$  Hz, 1H), 7.04-7.00 (m, 2H), 5.96 (s, 1H), 3.79 (s, 3H), 2.30 (s, 3H), 2.09 (s, 3H). (one signal overlapped with *para* derivative).

$^{13}\text{C-NMR}$  (126 MHz,  $\text{CDCl}_3$ )  $\delta$  158.92, 154.82, 149.07, 148.67, 139.61, 133.26, 130.03, 129.41, 126.53, 120.94, 114.25, 112.02, 106.38, 105.30, 55.92, 55.67, 13.81, 13.65, 12.29, 11.40.

**1-(4-methoxyphenyl)-1H-benzo[d][1,2,3]triazole, benzo[d][1,2,3]triazole (**7g**)**

**1-(2-methoxyphenyl)-1H**

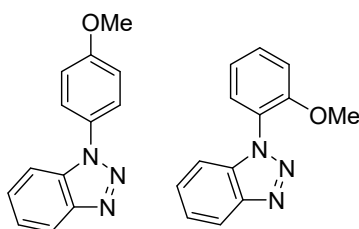

Prepared according to the general procedure using anisole **6a** (0.05 mmol, 5.4  $\mu$ L), and benzotriazole (0.1 mmol, 11.9 mg). The product **7g** was purified by flash chromatography (PE 100% to  $\text{CH}_2\text{Cl}_2$  100%) to afford a faint yellow solid composed by an inseparable mixture of *para* and *ortho* isomers in a ratio of 3:1. NMR Yield: >95%, Isolated yield: >95%, 11.0 mg. The characterization data matched with the reported one.<sup>1</sup>

*para*:  $^1\text{H-NMR}$  (400 MHz,  $\text{CDCl}_3$ )  $\delta$  8.13 (dt,  $J = 8.3, 0.9$  Hz, 1H), 7.68-7.66 (m, 3H), 7.55 – 7.51 (m, 1H), 7.49 – 7.35 (m, 1H), 7.12 (d,  $J = 9.0$  Hz, 2H), 3.91 (s, 3H).

*ortho*:  $^1\text{H-NMR}$  (400 MHz,  $\text{CDCl}_3$ )  $\delta$  8.13 (dt,  $J = 1.0$  Hz, 1H), 7.50 – 7.46 (m, 2H), 7.46-7.44 (m, 1H), 7.38 (dt,  $J = 8.1, 1.0$  Hz, 2H), 7.22 – 7.14 (m, 2H), 3.80 (s, 3H).

$^{13}\text{C-NMR}$  (101 MHz,  $\text{CDCl}_3$ )  $\delta$  159.97, 146.44, 132.79, 131.16, 130.67, 130.13, 128.28, 128.15, 127.85, 127.66, 124.76, 124.37, 123.97, 121.24, 120.35, 120.00, 115.11, 112.51, 111.31, 110.38, 55.95, 55.81. (some *ortho* signals not visible due to low concentration).

**1-(4-methoxyphenyl)-1H-5,6-dichlorobenzo[d]imidazole, 5,6-dichlorobenzo[d]imidazole (**7h**)**

**1-(2-methoxyphenyl)-1H**

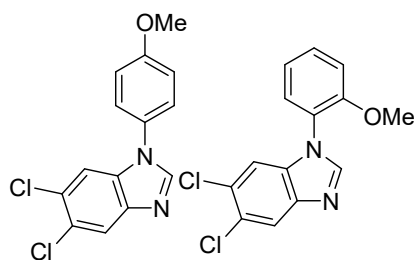

Prepared according to the general procedure using anisole **6a** (0.05 mmol, 5.4  $\mu$ L), and 5,6-dichlorobenzimidazole (0.1 mmol, 18.6 mg). The product **7h** was purified by flash chromatography (PE 100% to  $\text{CH}_2\text{Cl}_2$  100%) to afford a faint yellow solid composed by an inseparable mixture of *para* and *ortho* isomers in a ratio of 2.5:1. Isolated yield: 60%, 8.8 mg.

*Para*:  $^1\text{H-NMR}$  (400 MHz,  $\text{CDCl}_3$ )  $\delta$  7.77 (s, 1H), 7.67 (s, 1H), 7.11-7.10 (m, 3H), 6.81 (d,  $J = 8.9$  Hz, 2H), 3.63 (s, 3H).

*Ortho*:  $^1\text{H-NMR}$  (400 MHz,  $\text{CDCl}_3$ )  $\delta$  7.78 (s, 1H), 7.67 (s, 1H), 7.22 (td,  $J = 7.8, 1.6$  Hz, 1H), 6.99 (s, 1H), 6.89 – 6.84 (m, 3H), 3.54 (s, 3H).

$^{13}\text{C-NMR}$  (101 MHz,  $\text{CDCl}_3$ )  $\delta$  159.95, 154.03, 146.29, 145.66, 144.44, 143.20, 142.77, 133.68, 130.56, 128.32, 127.91, 127.58, 127.31, 126.96, 125.91, 121.80, 121.54, 121.34, 115.49, 112.67, 112.40, 111.96, 55.94, 55.84.

ESI-HRMS:  $[\text{M}+\text{H}]^+$  calc. for  $[\text{C}_{14}\text{H}_{11}^{35}\text{Cl}_2\text{N}_2\text{O}]^+$ : 293.0243; found 293.0242.

## 6.0 NMR Reversibility studies

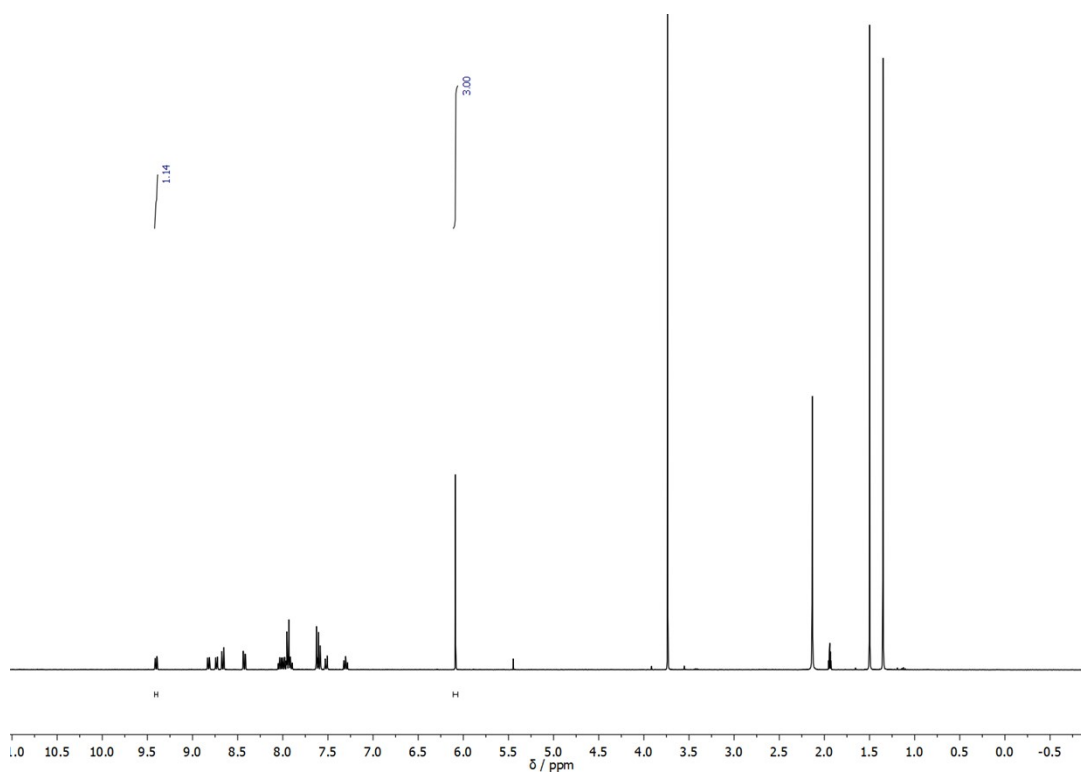

**Figure S23.** 400 MHz  $^1\text{H-NMR}$  of **1<sup>ox</sup>** in  $\text{ACN-}d_3$  (0.9 eq. of 1,3,5-trimethoxy benzene as internal standard).



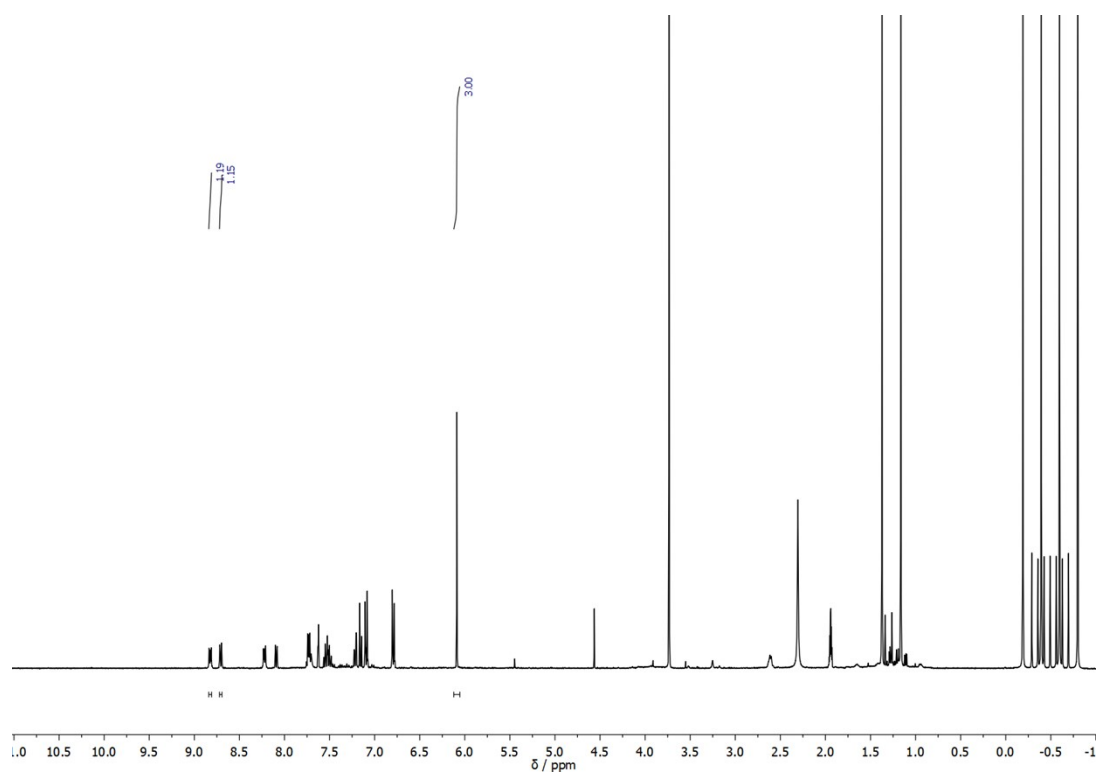

**Figure S24.** 400 MHz  $^1\text{H-NMR}$  of **1** in  $\text{ACN-}d_3$  (0.9 eq. of 1,3,5-trimethoxy benzene as internal standard) after addition of an excess of  $\text{NaBH}_4$ .

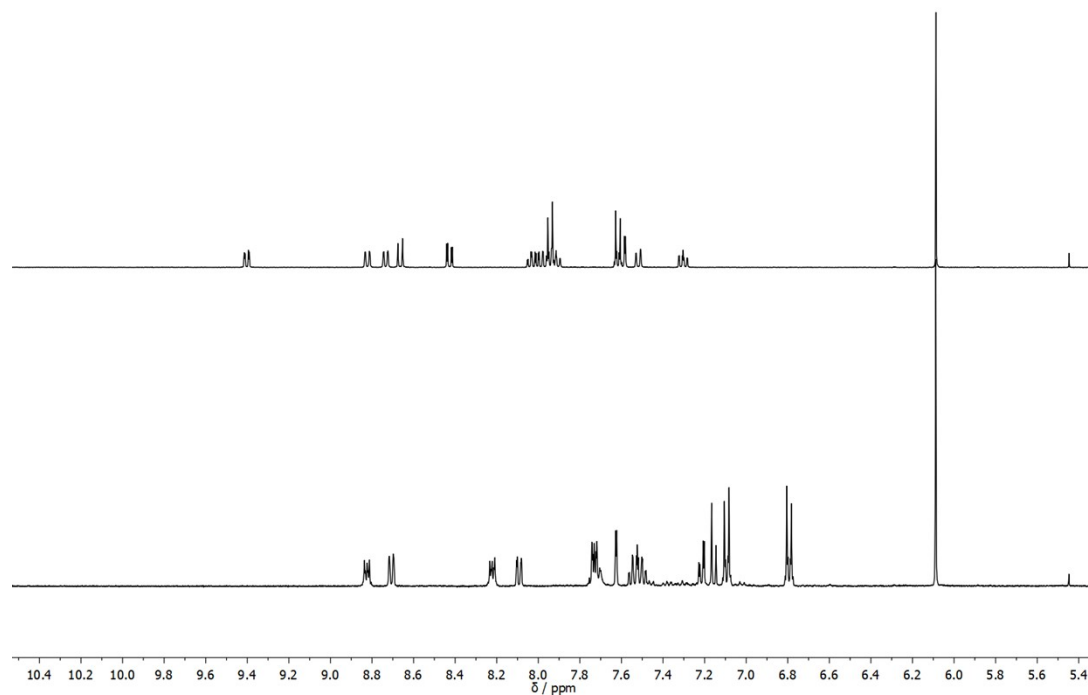

**Figure S25.** Detail of the aromatic region of the spectra a) before and b) after addition of  $\text{NaBH}_4$ .

## 7.0 NMR and HRMS spectroscopic characterization

### Catalysts

#### 7.1 Derivative 2

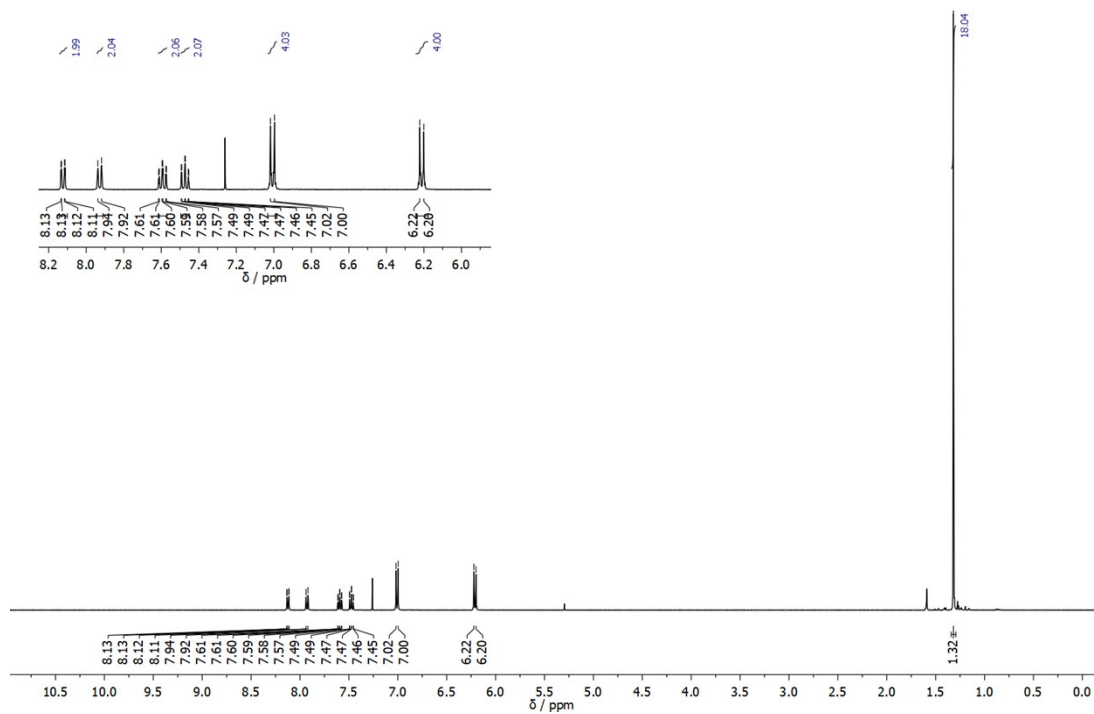

Figure S26. 400 MHz  $^1\text{H}$ -NMR of **2** in  $\text{CDCl}_3$ .

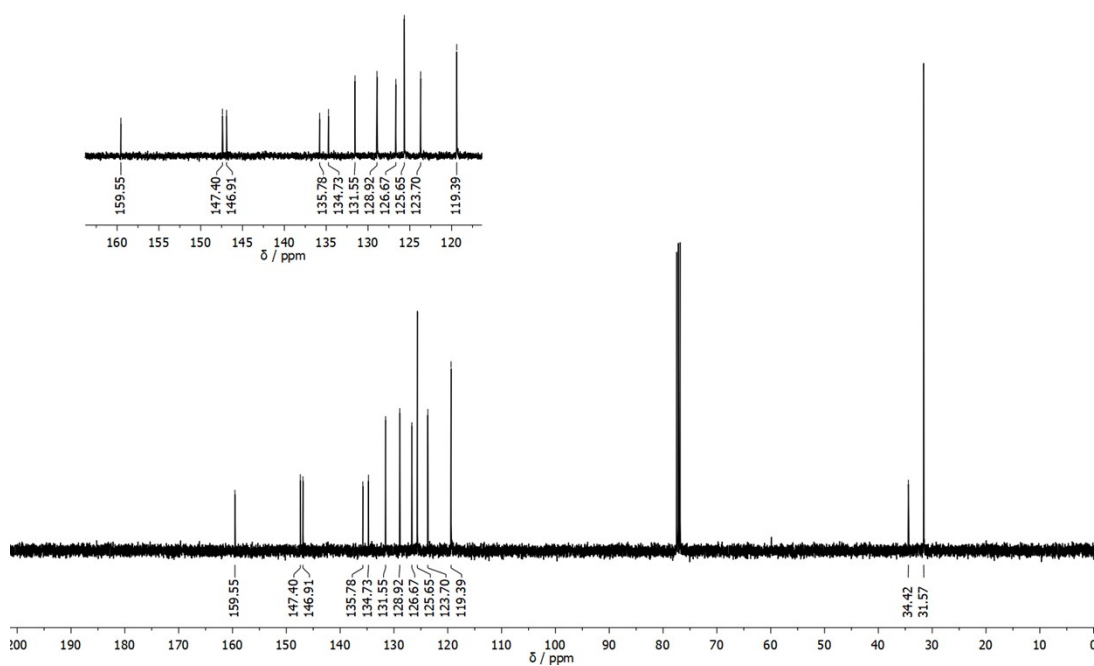

Figure S27. 101 MHz  $^{13}\text{C}$ -NMR of **2** in  $\text{CDCl}_3$ .

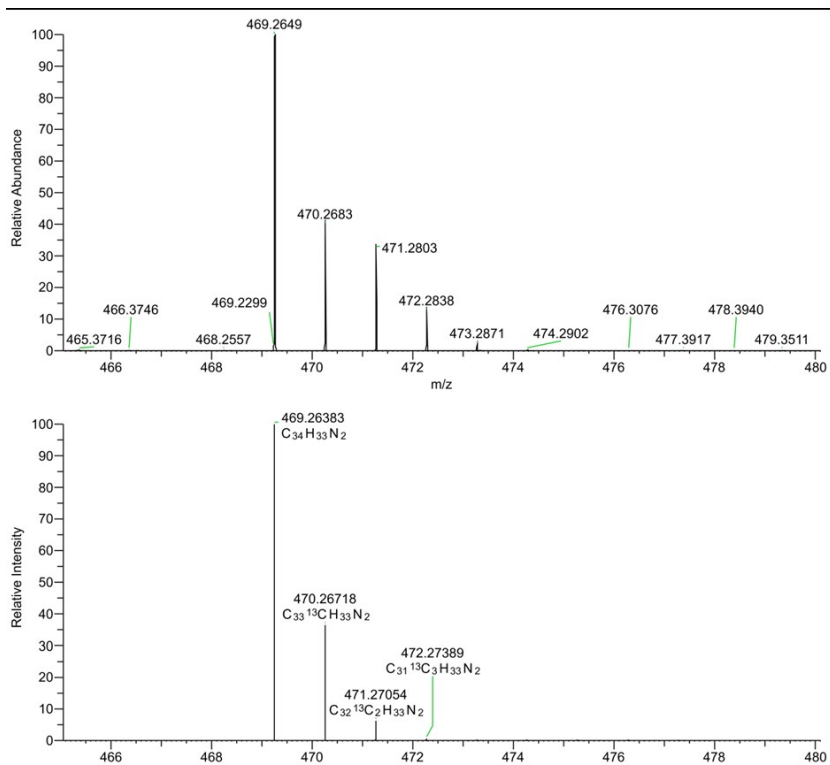

Figure S28. ESI-HRMS of 2.

## 7.2 Derivative 3

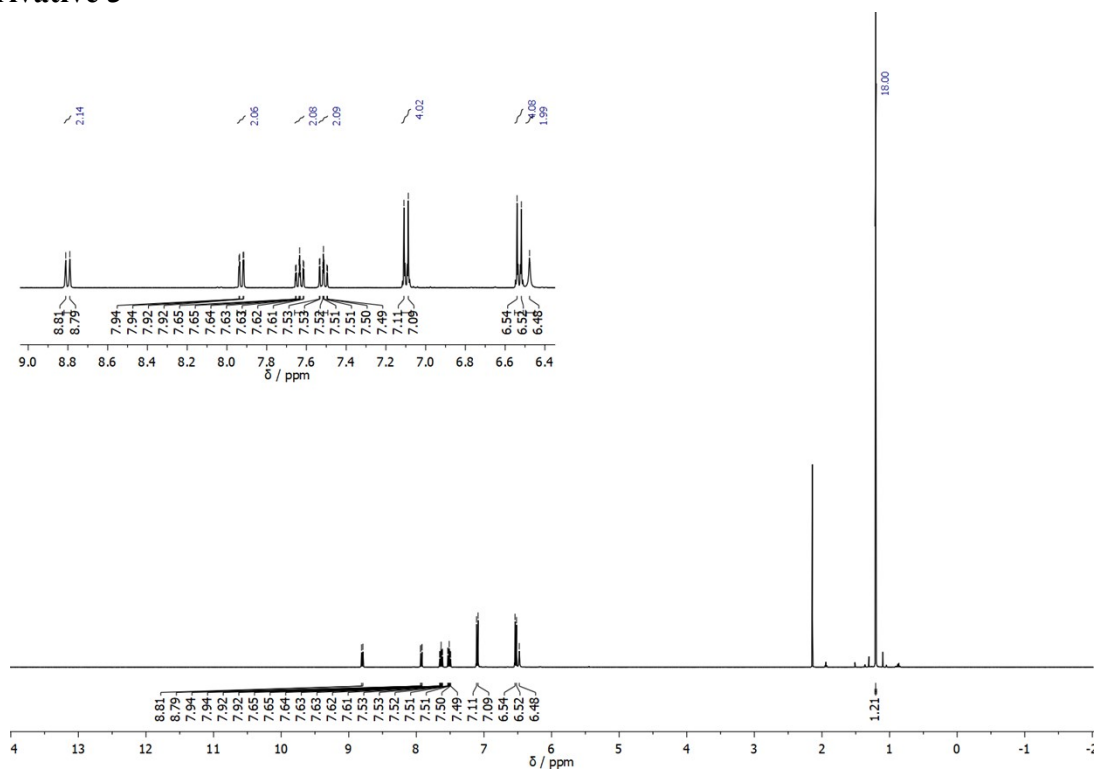

Figure S29. 400 MHz  $^1H$ -NMR of 3 in  $CDCl_3$ .

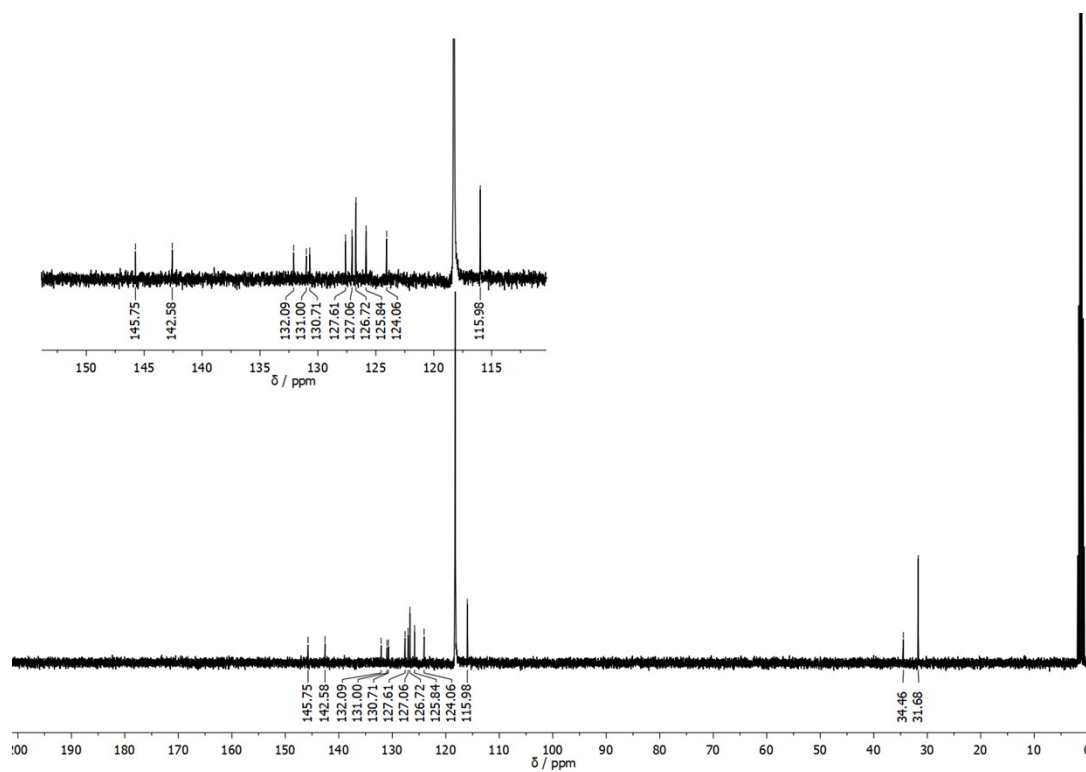

Figure S30. 101 MHz  $^{13}\text{C}$ -NMR of **3** in  $\text{CDCl}_3$ .

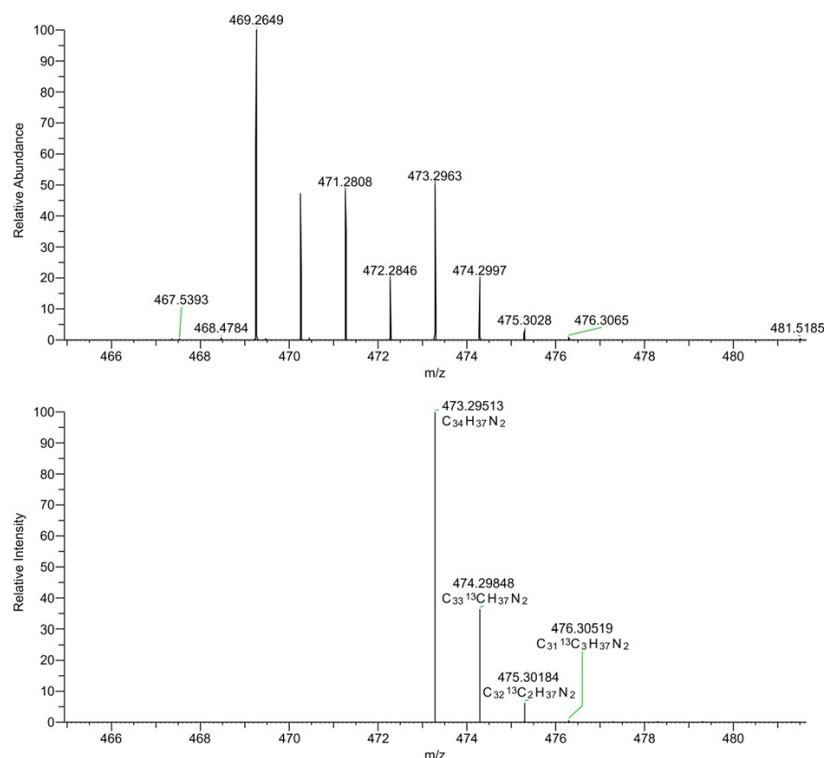

Figure S31. ESI-HRMS of **3**. Partial cyclization and oxidation of sample occurs during analysis.

### 7.3 Derivative 1

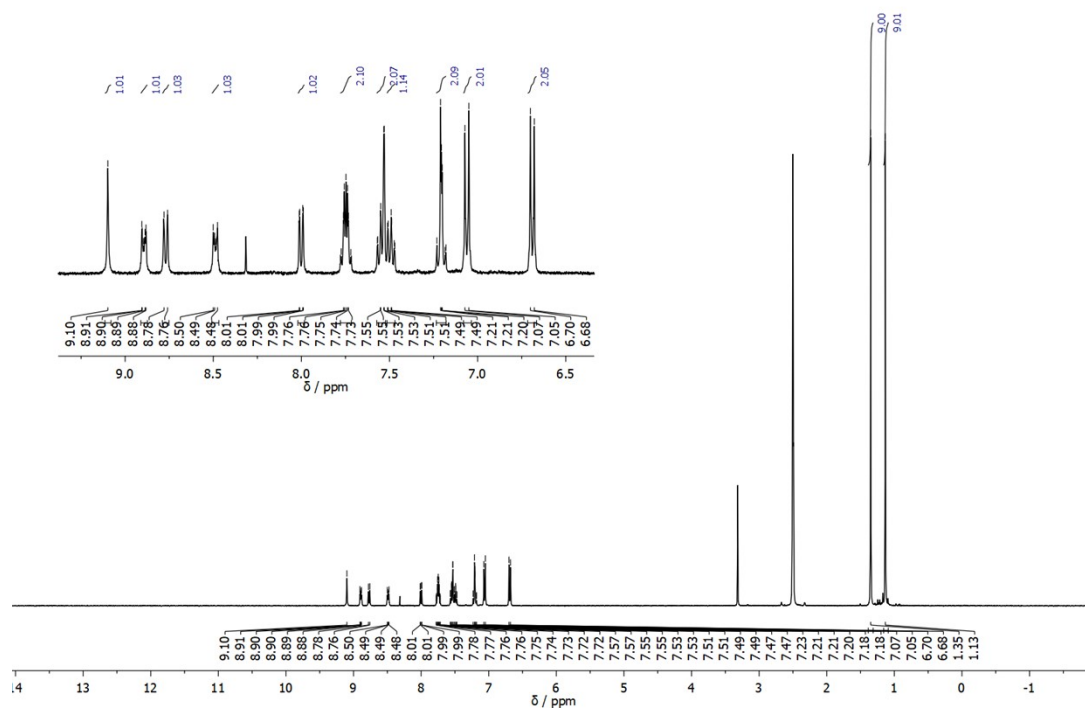

Figure S32. 400 MHz  $^1\text{H}$ -NMR of **1** in  $\text{DMSO-}d_6$ .

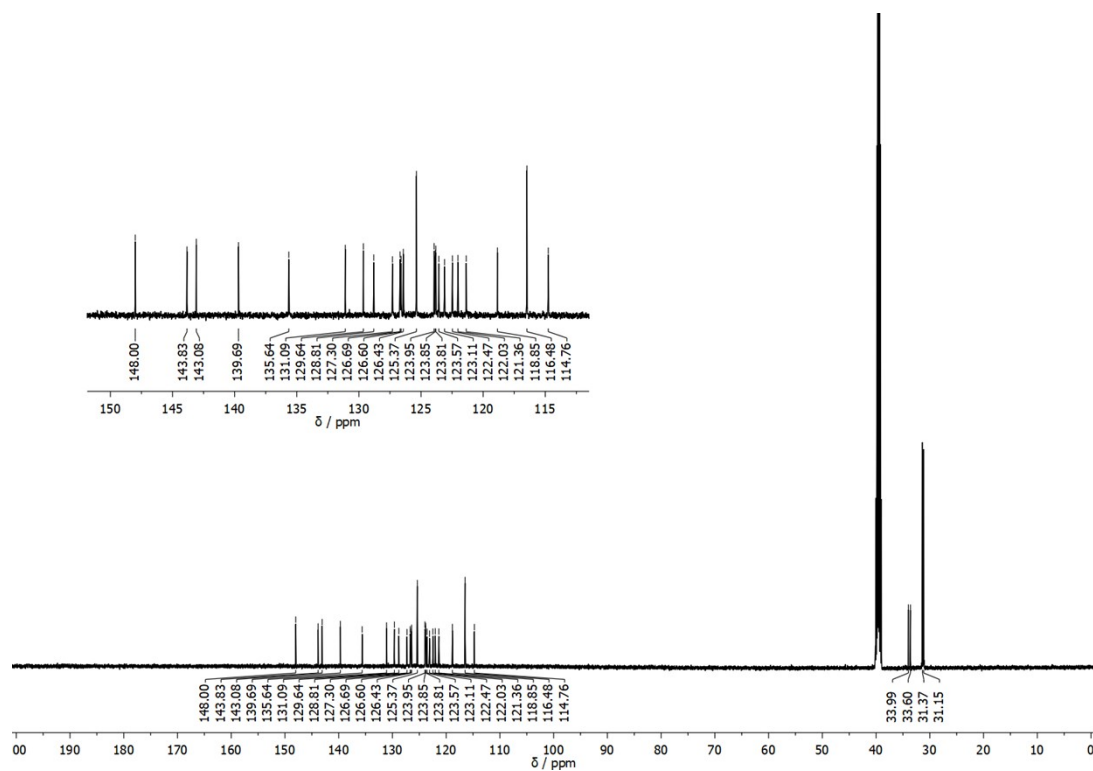

Figure S33. 126 MHz  $^{13}\text{C}$ -NMR of **1** in  $\text{DMSO-}d_6$ .

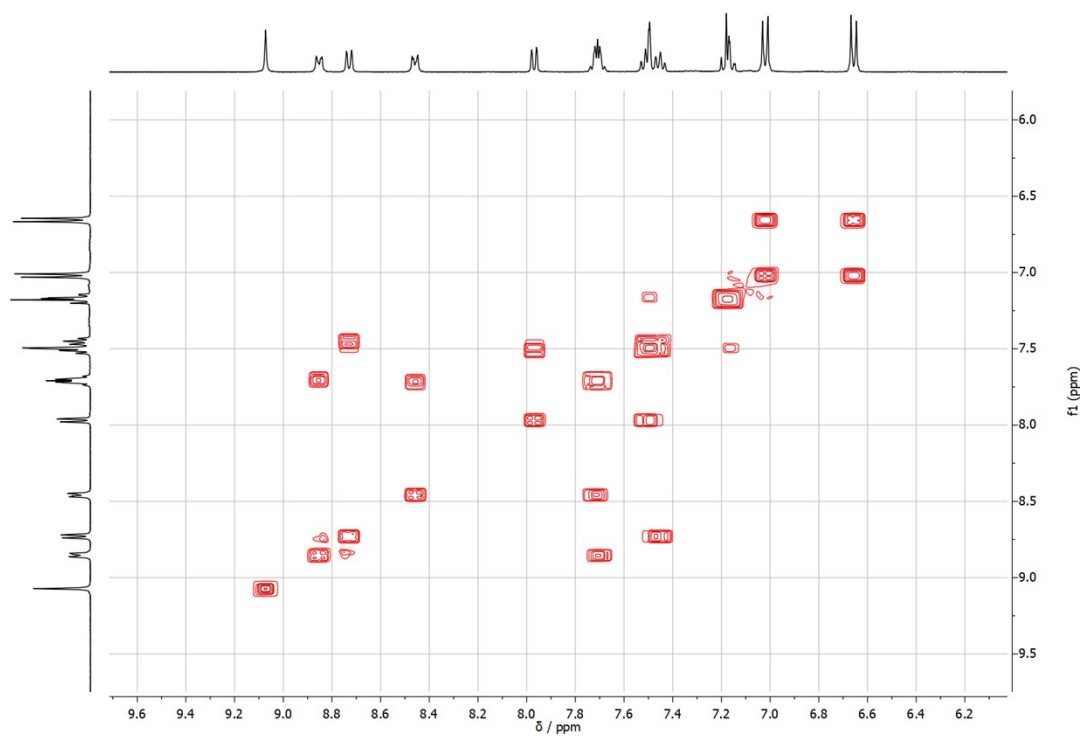

Figure S34. 400 MHz  $^1\text{H}$ - $^1\text{H}$ -NMR of **1** in  $\text{DMSO-}d_6$  aromatic part detail

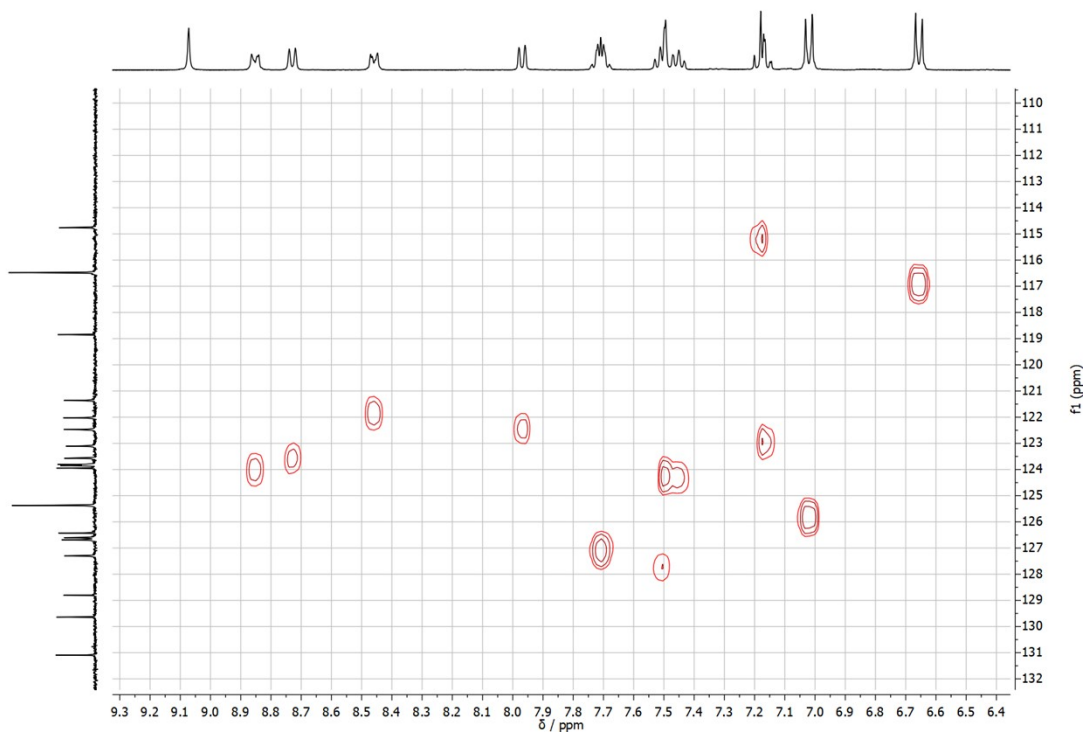

Figure S35. 400 MHz  $^1\text{H}$ - $^{13}\text{C}$ -NMR HSQC of **1** in  $\text{DMSO-}d_6$  aromatic part detail

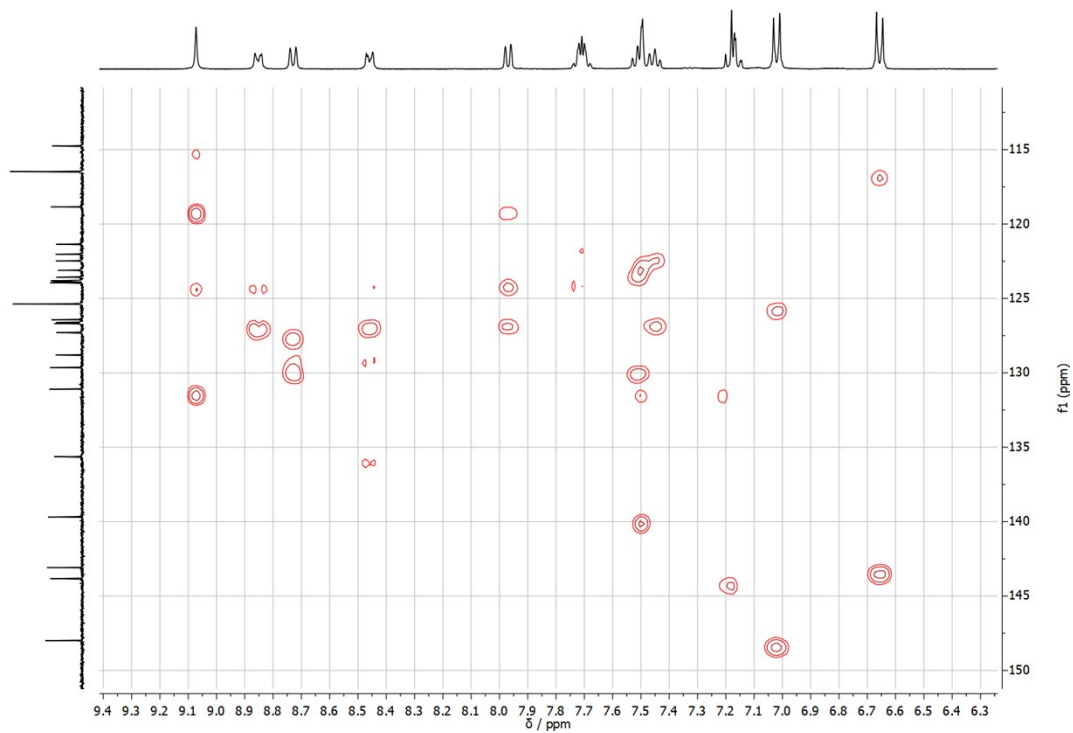

Figure S36. 400 MHz  $^1\text{H}$ - $^{13}\text{C}$ -NMR HMBC of **1** in  $\text{DMSO-}d_6$  aromatic part detail

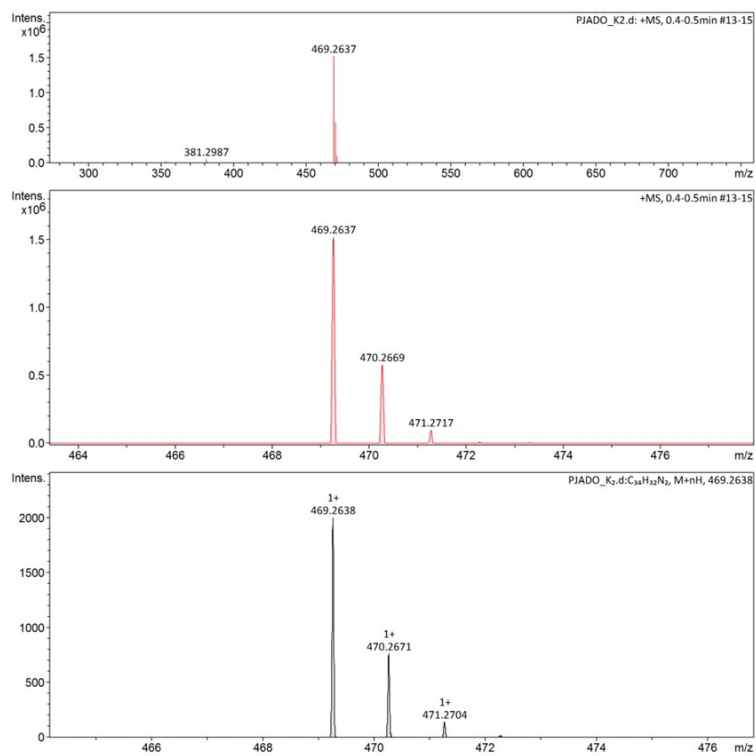

Figure S37. ESI-HRMS of **1**.

## 7.4 Derivative 1<sup>ox</sup>

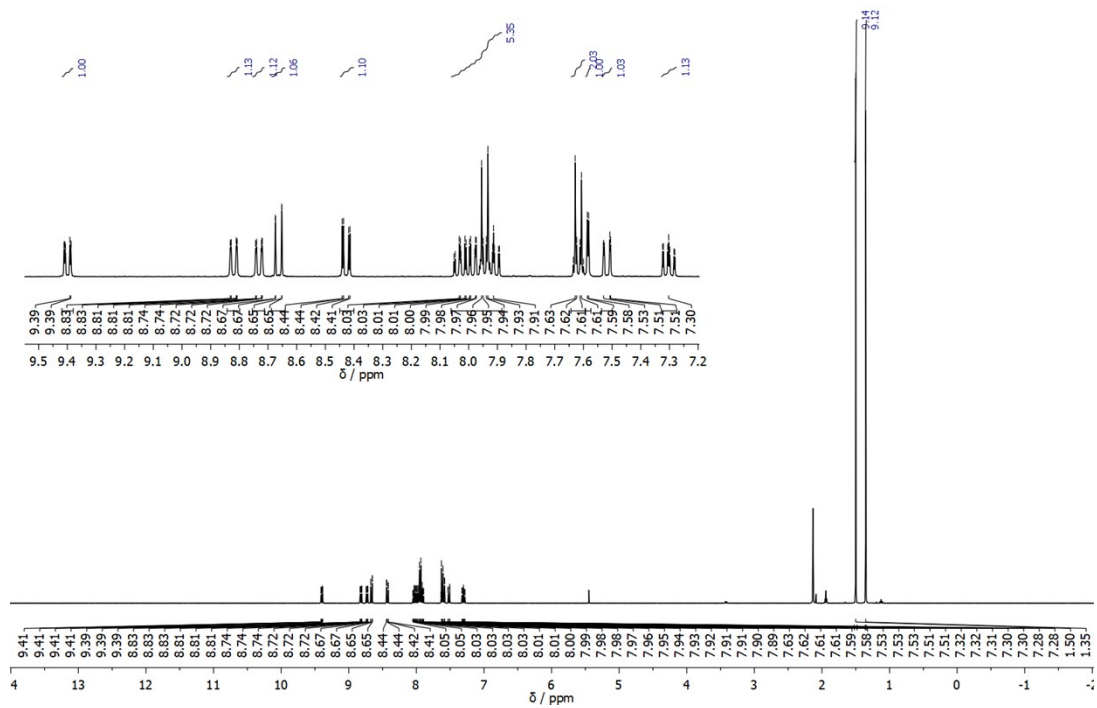

Figure S38. 400 MHz <sup>1</sup>H-NMR of **1<sup>ox</sup>** in ACN-d<sub>3</sub>.

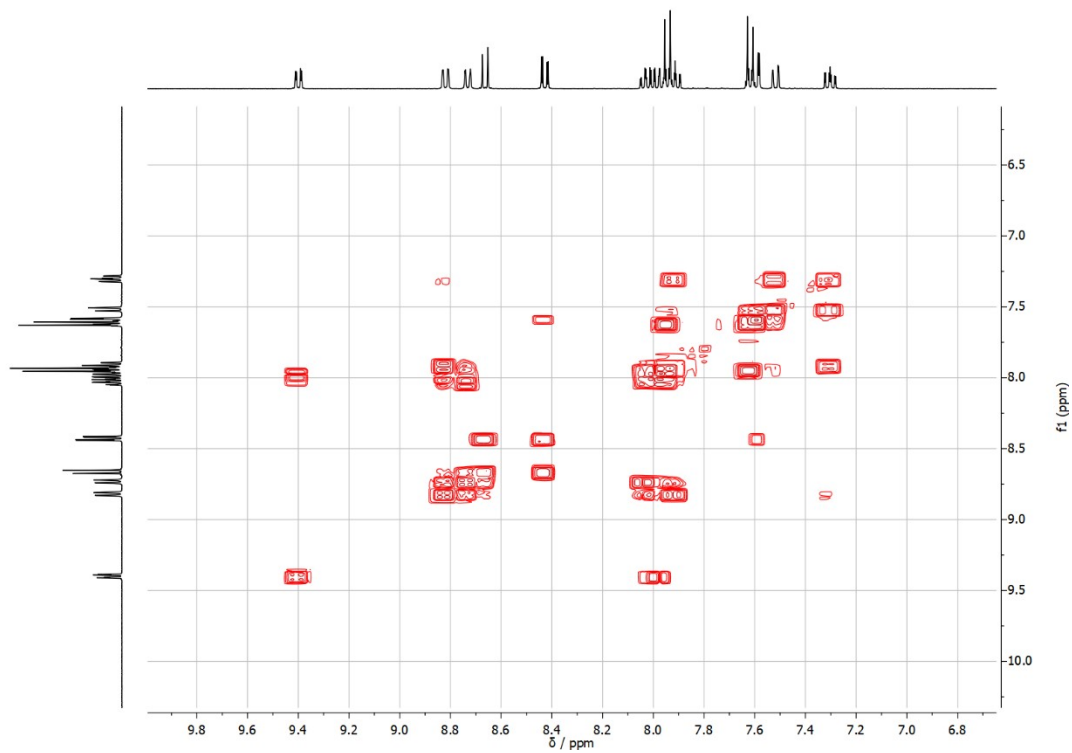

Figure S39. 400 MHz <sup>1</sup>H-<sup>1</sup>H-NMR of **1<sup>ox</sup>** in ACN-d<sub>3</sub> aromatic part detail



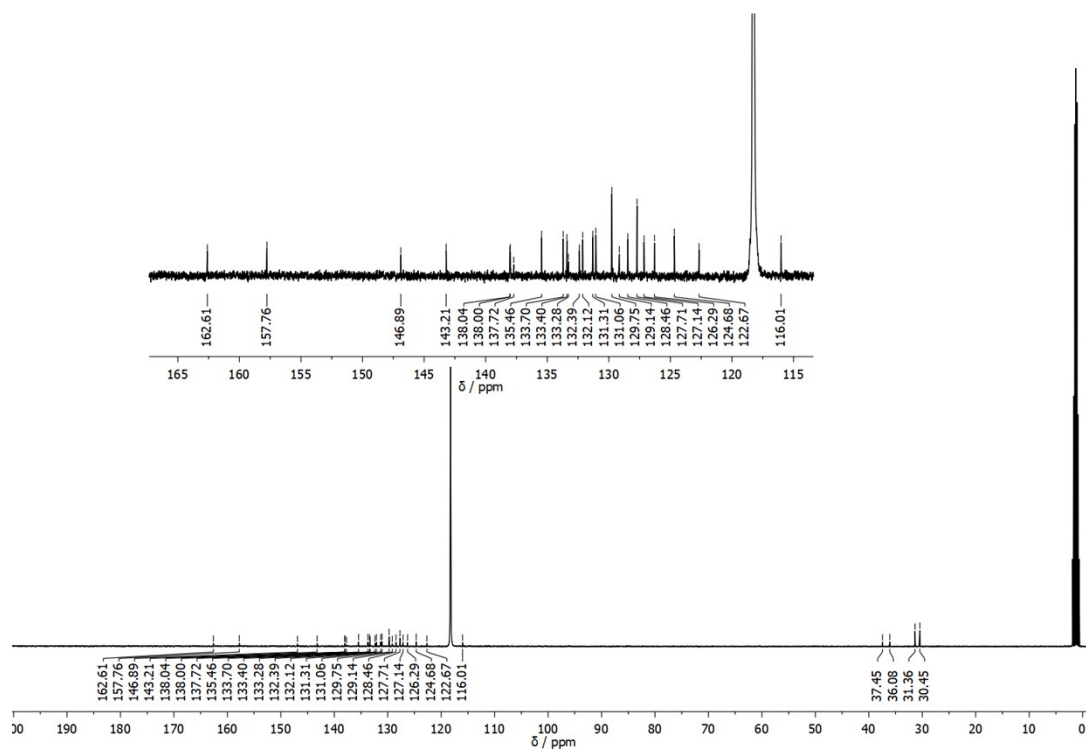

Figure S40. 101 MHz  $^{13}\text{C}$ -NMR of  $1^{\text{ox}}$  in  $\text{ACN-}d_3$ .

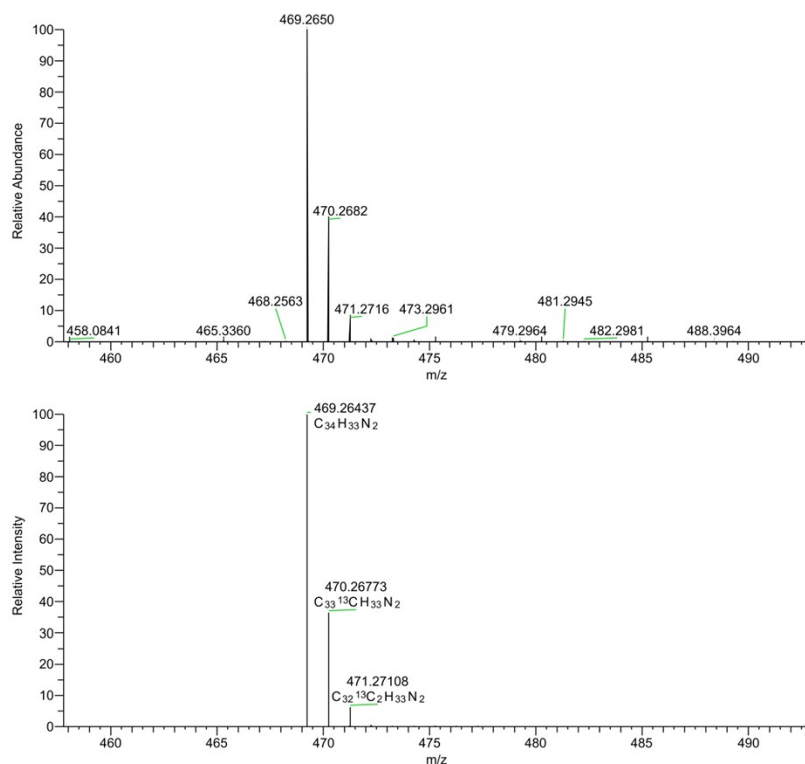

Figure S41. ESI-HRMS of  $1^{\text{ox}}$ .

## 8.0 Dehalogenation Reactions

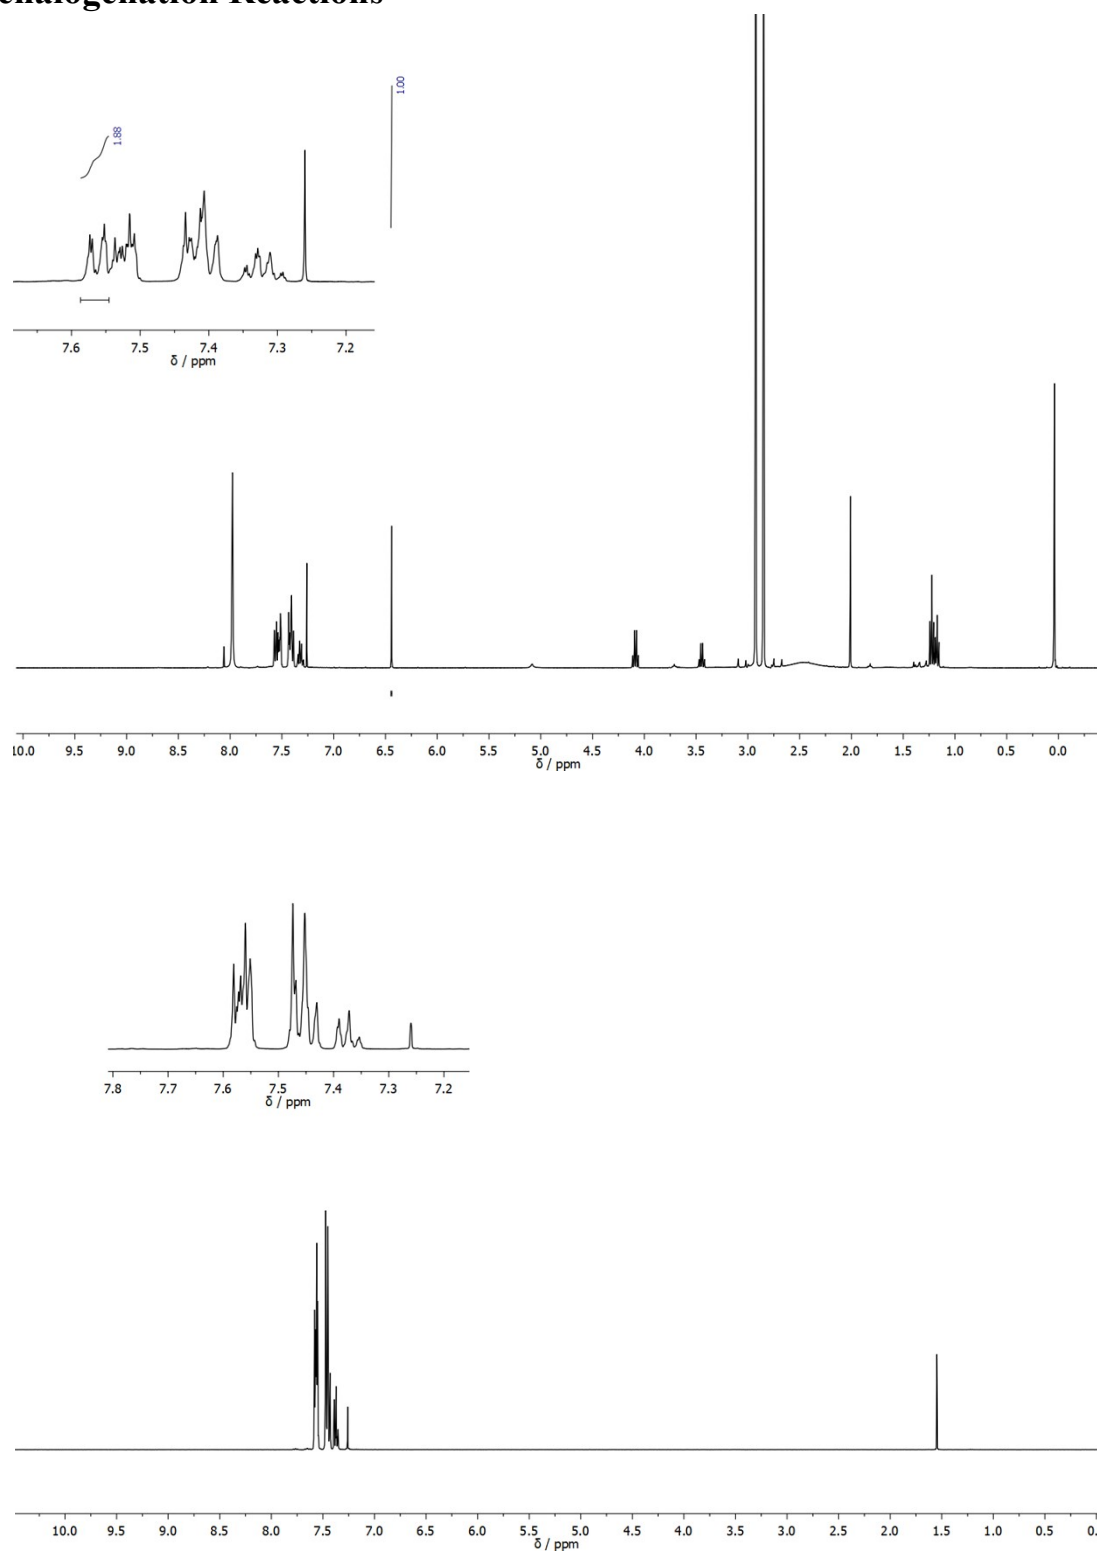

**Figure S42.** 400 MHz <sup>1</sup>H-NMR of top) **4c** dehalogenation in CDCl<sub>3</sub> bottom) starting material **4c**.

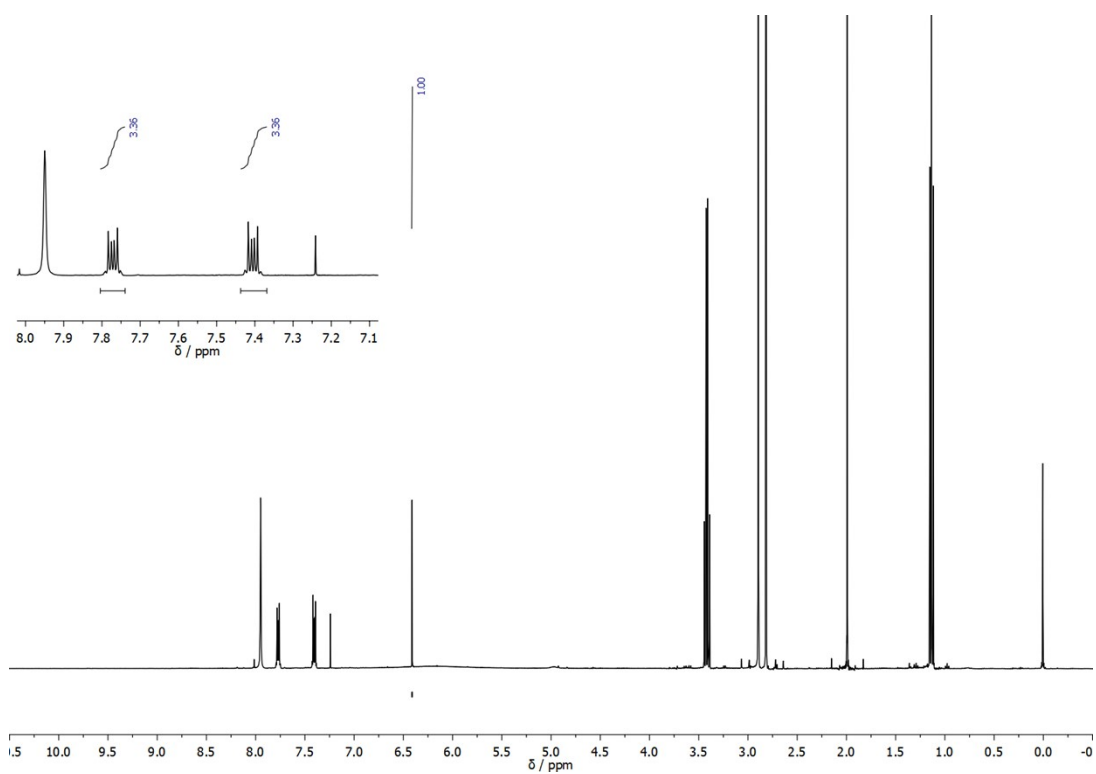

**Figure S43.** 400 MHz <sup>1</sup>H-NMR of **4e** reaction in CDCl<sub>3</sub>.

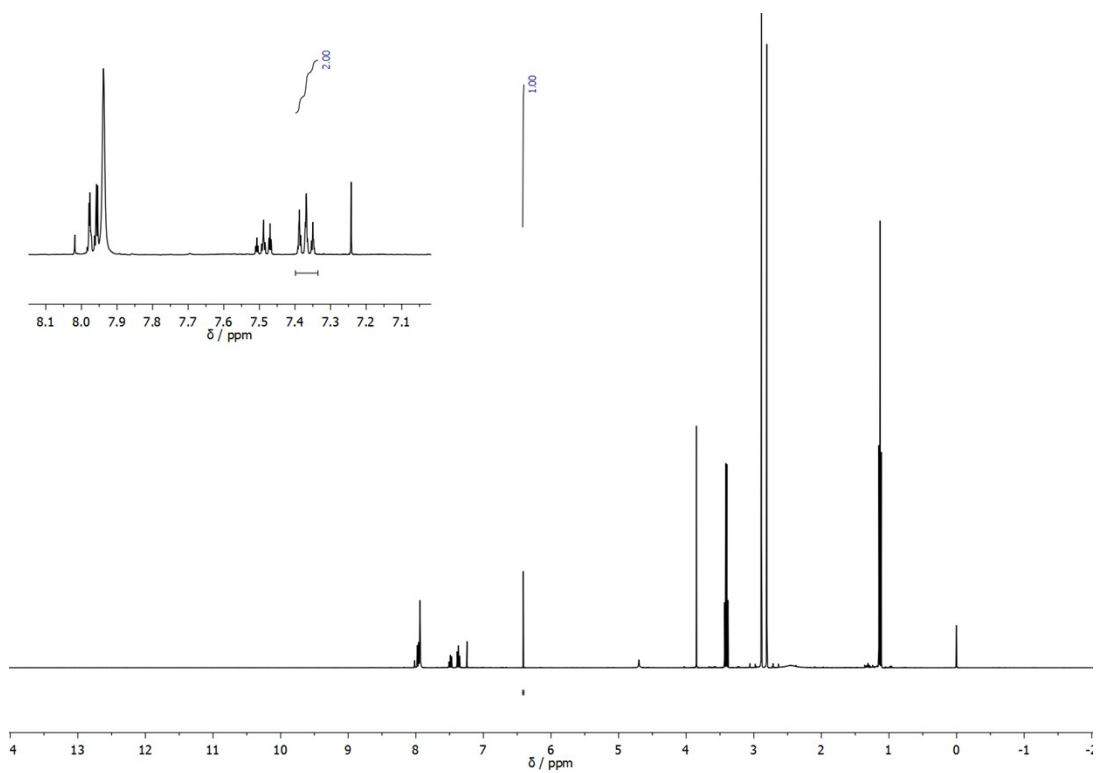

**Figure S44.** 400 MHz <sup>1</sup>H-NMR of **4d** reaction in CDCl<sub>3</sub>.

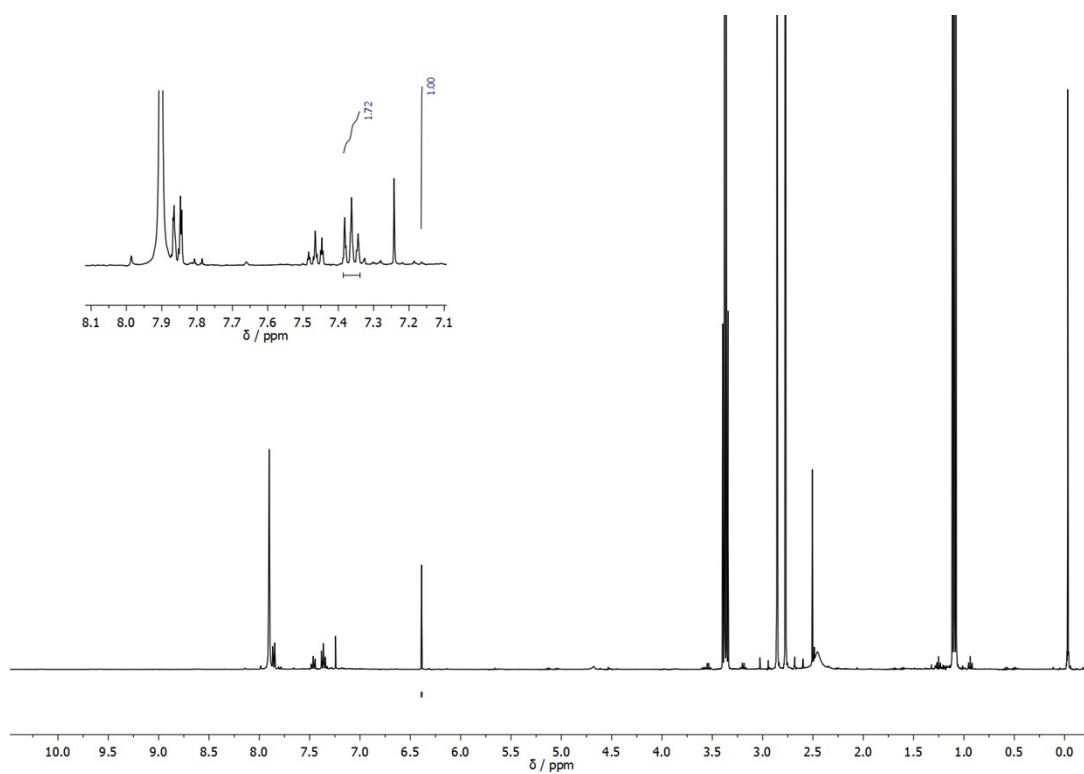

**Figure S45.** 400 MHz <sup>1</sup>H-NMR of **4b** reaction in CDCl<sub>3</sub>.

## 9.0 Oxidation Reactions products

### 9.1 7a NMR Spectra

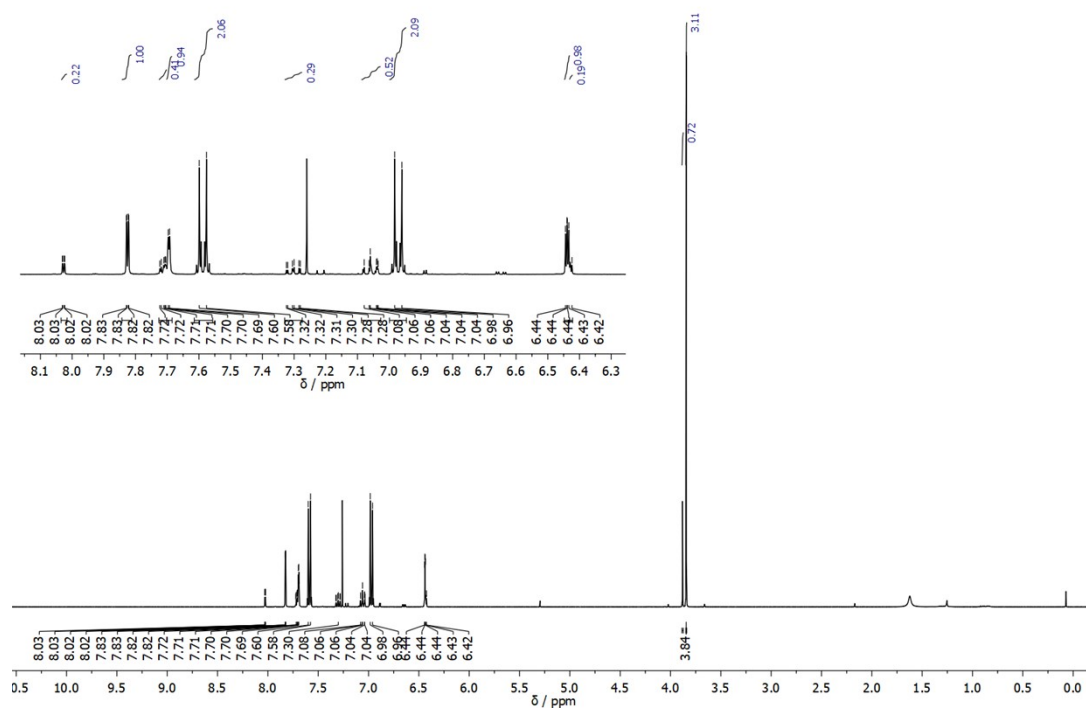

Figure S46. 400 MHz  $^1\text{H-NMR}$  of **7a** in  $\text{CDCl}_3$ .

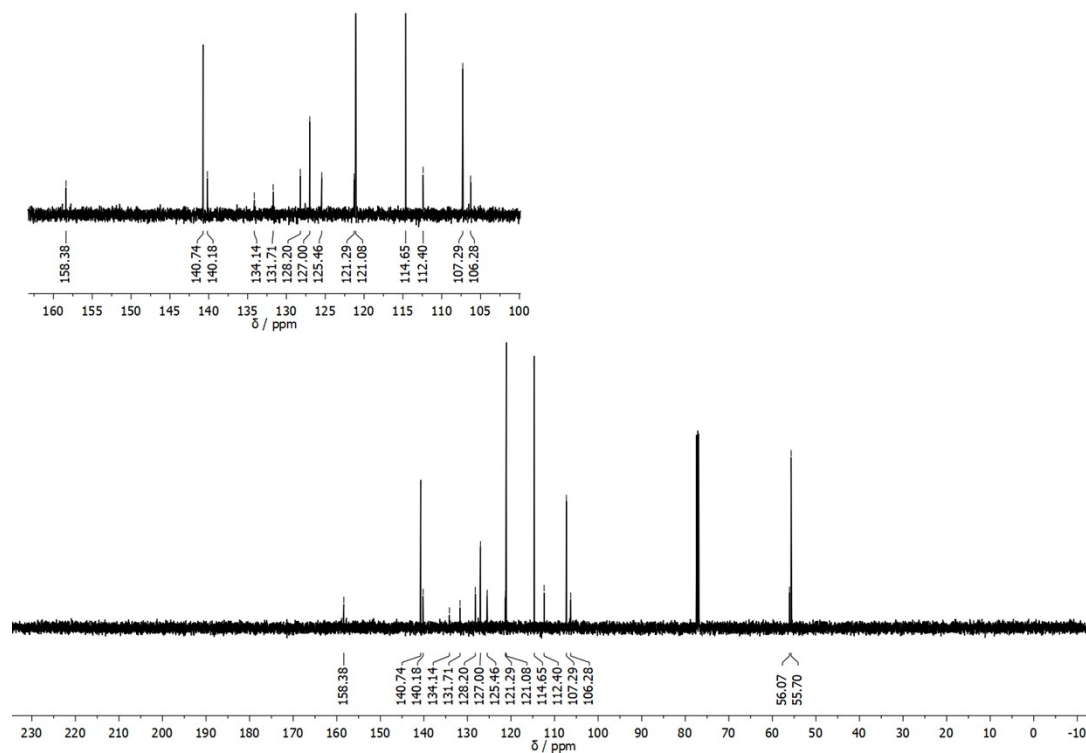

Figure S47. 126 MHz  $^{13}\text{C-NMR}$  of **7a** in  $\text{CDCl}_3$ .

## 9.2 7b NMR Spectra

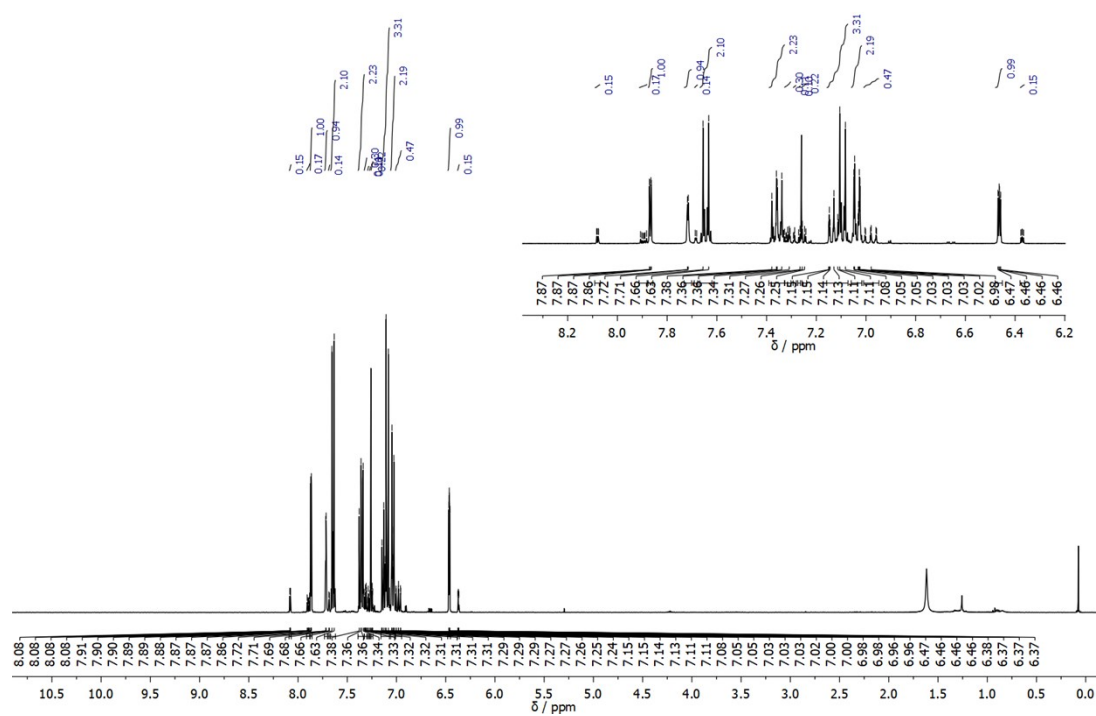

Figure S48. 400 MHz  $^1\text{H}$ -NMR of **7b** in  $\text{CDCl}_3$ .

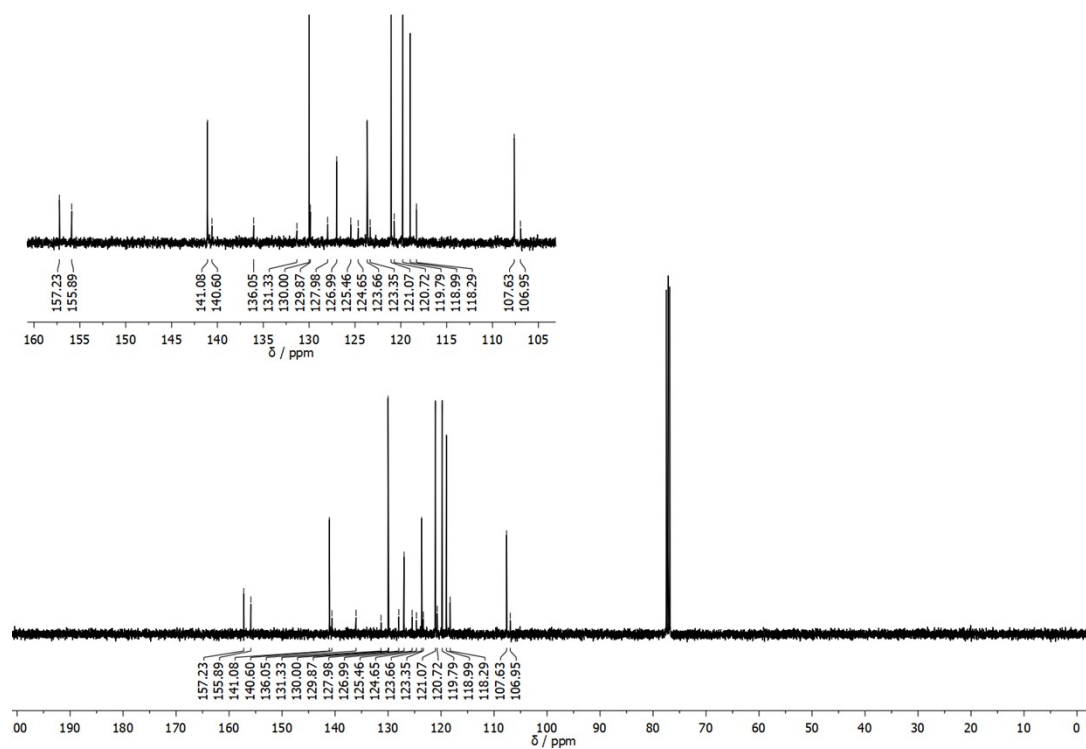

Figure S49. 101 MHz  $^{13}\text{C}$ -NMR of **7b** in  $\text{CDCl}_3$ .

### 9.3 7c NMR Spectra

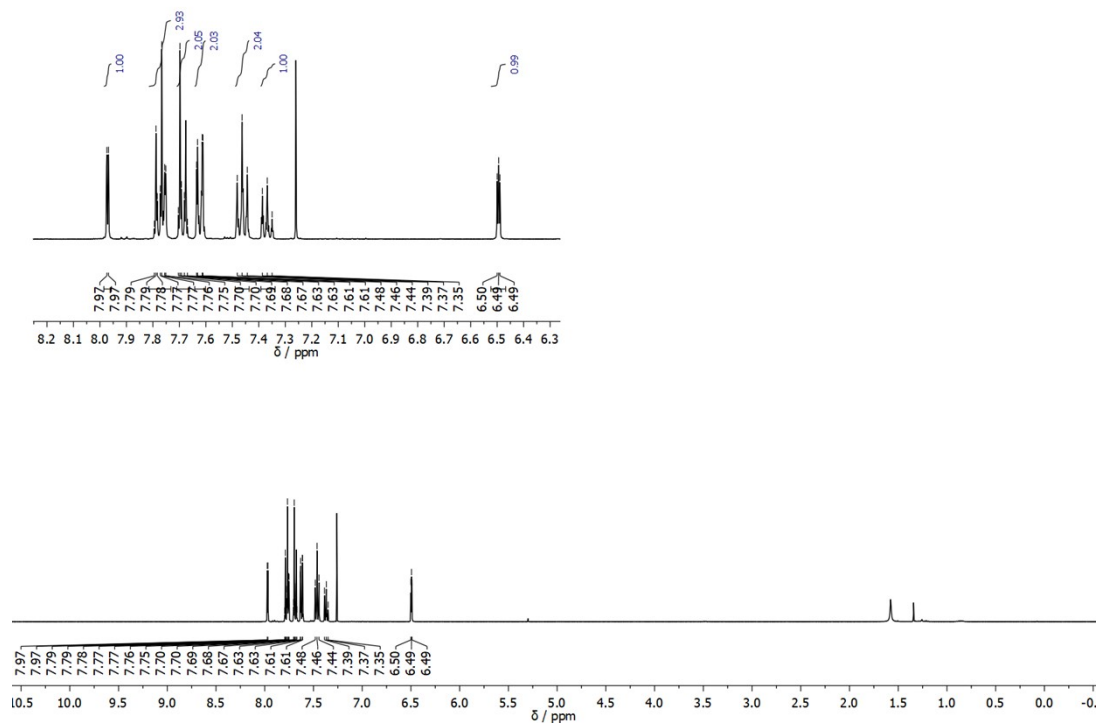

Figure S50. 400 MHz <sup>1</sup>H-NMR of 7c in CDCl<sub>3</sub>.

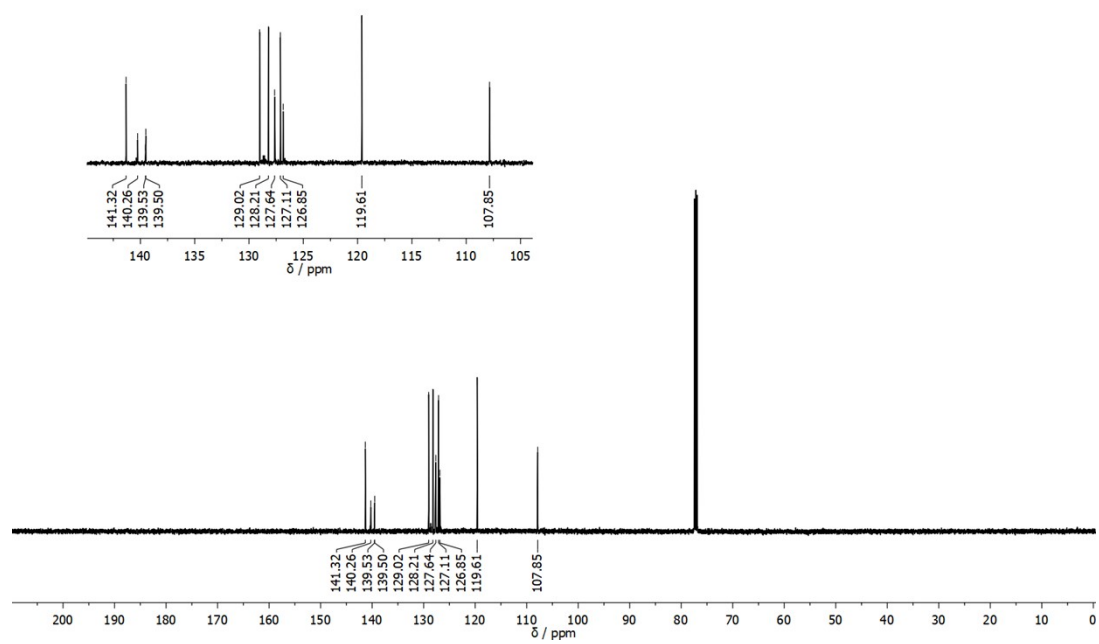

Figure S51. 101 MHz <sup>13</sup>C-NMR of 7c in CDCl<sub>3</sub>.

## 9.4 7d NMR Spectra

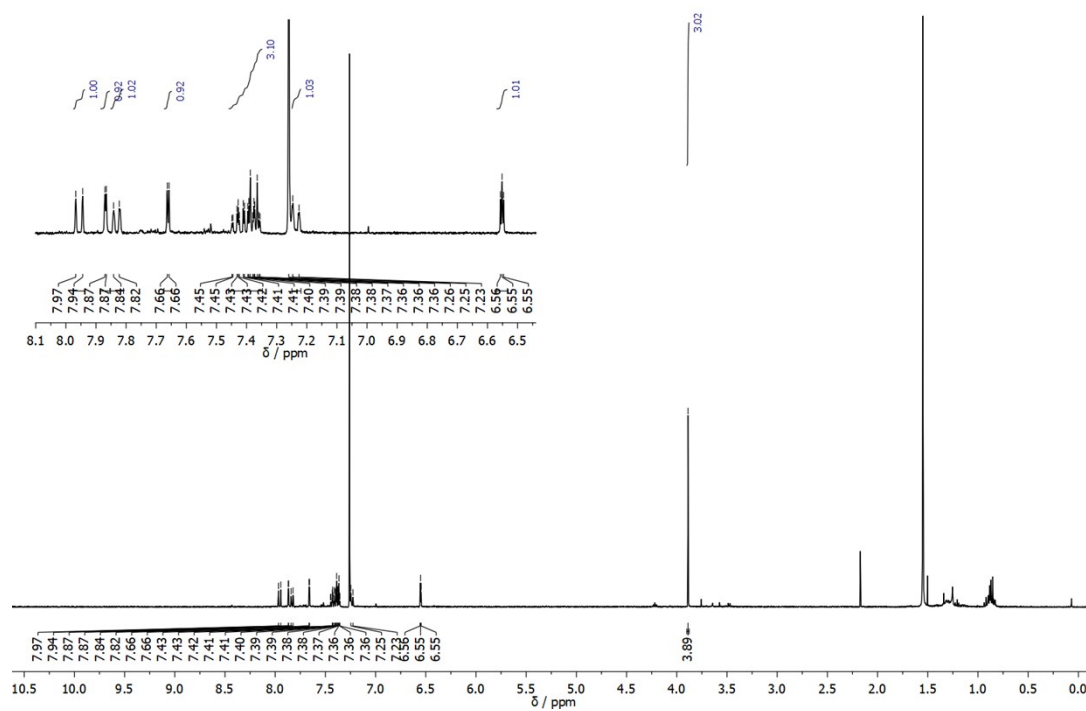

Figure S52. 500 MHz  $^1\text{H}$ -NMR of **7d** in  $\text{CDCl}_3$ .

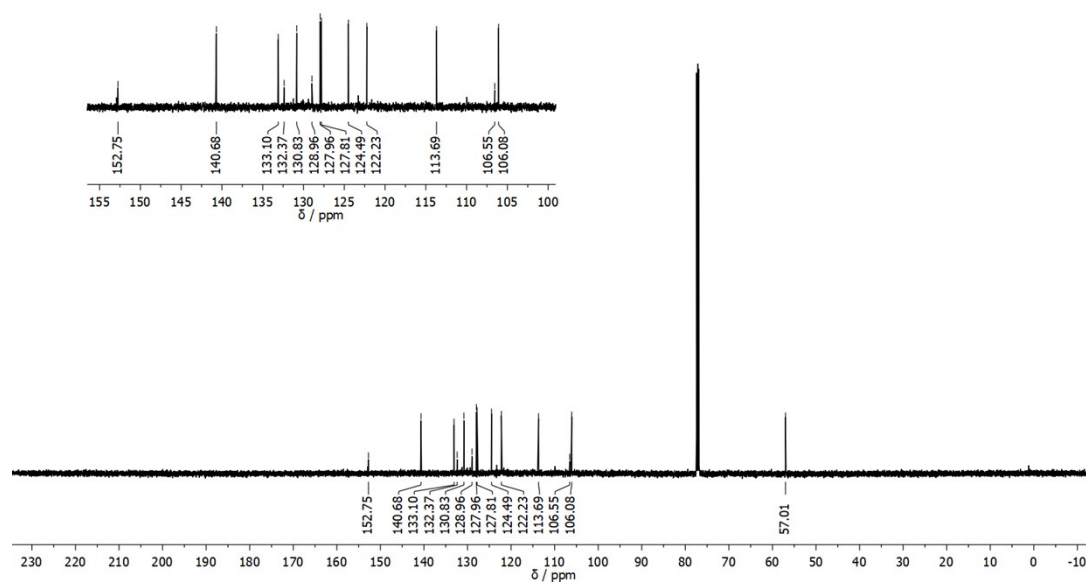

Figure S53. 126 MHz  $^{13}\text{C}$ -NMR of **7d** in  $\text{CDCl}_3$ .



## 9.5 7e NMR Spectra

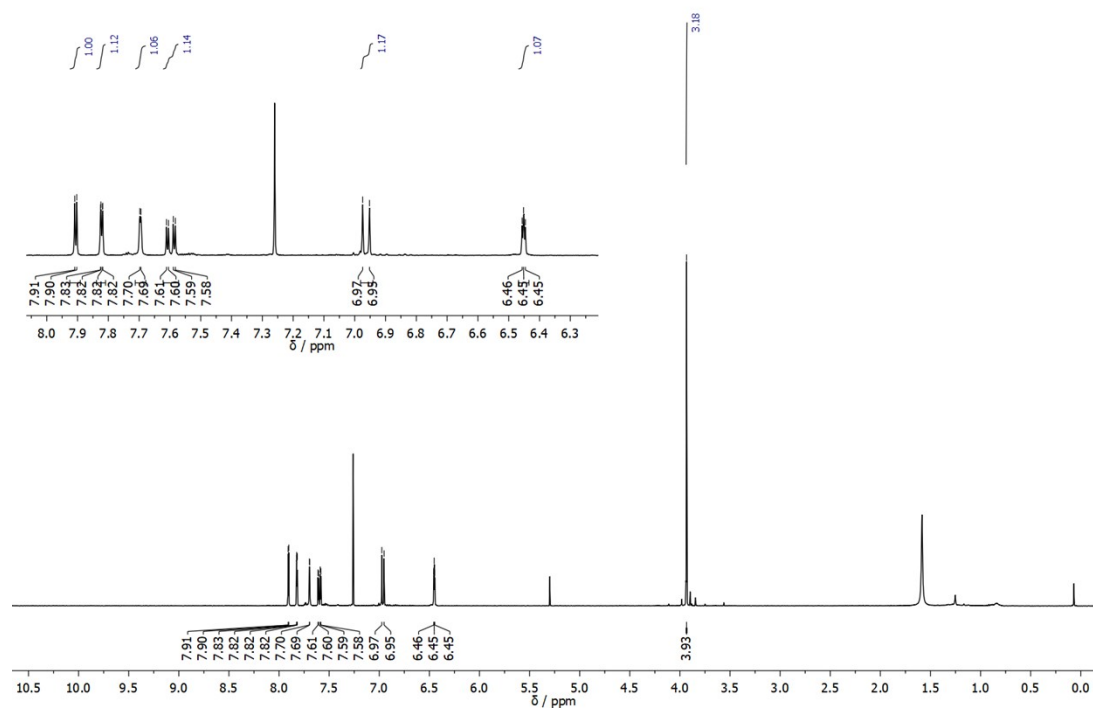

Figure S54. 400 MHz  $^1\text{H}$ -NMR of **7e** in  $\text{CDCl}_3$ .

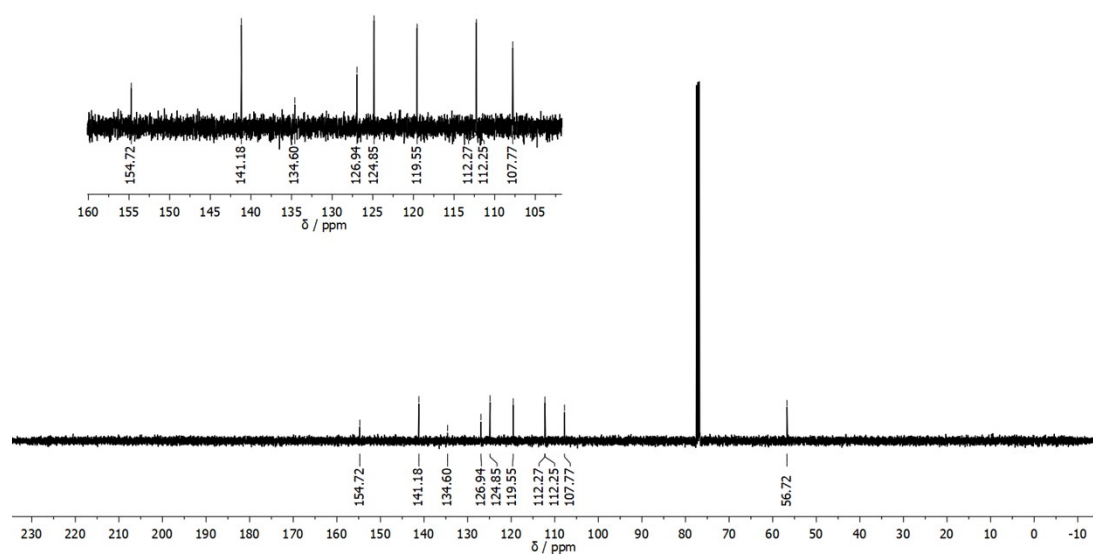

Figure S55. 101 MHz  $^{13}\text{C}$ -NMR of **7e** in  $\text{CDCl}_3$ .

## 9.6 7f NMR Spectra

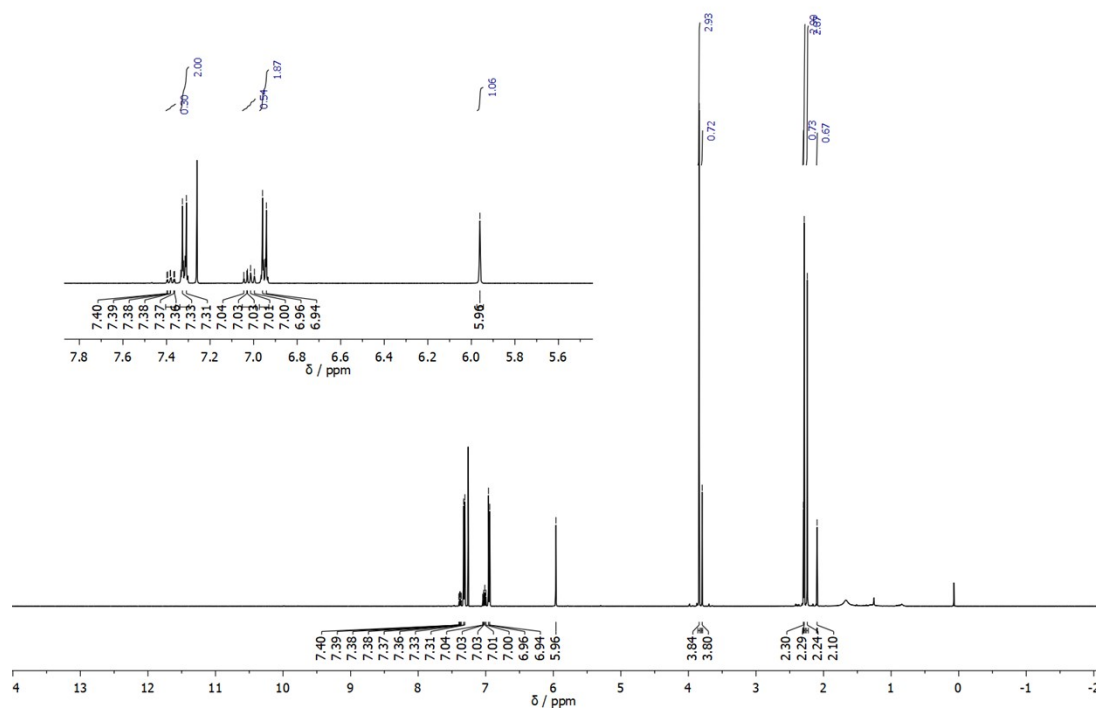

Figure S56. 500 MHz  $^1\text{H}$ -NMR of **7f** in  $\text{CDCl}_3$ .

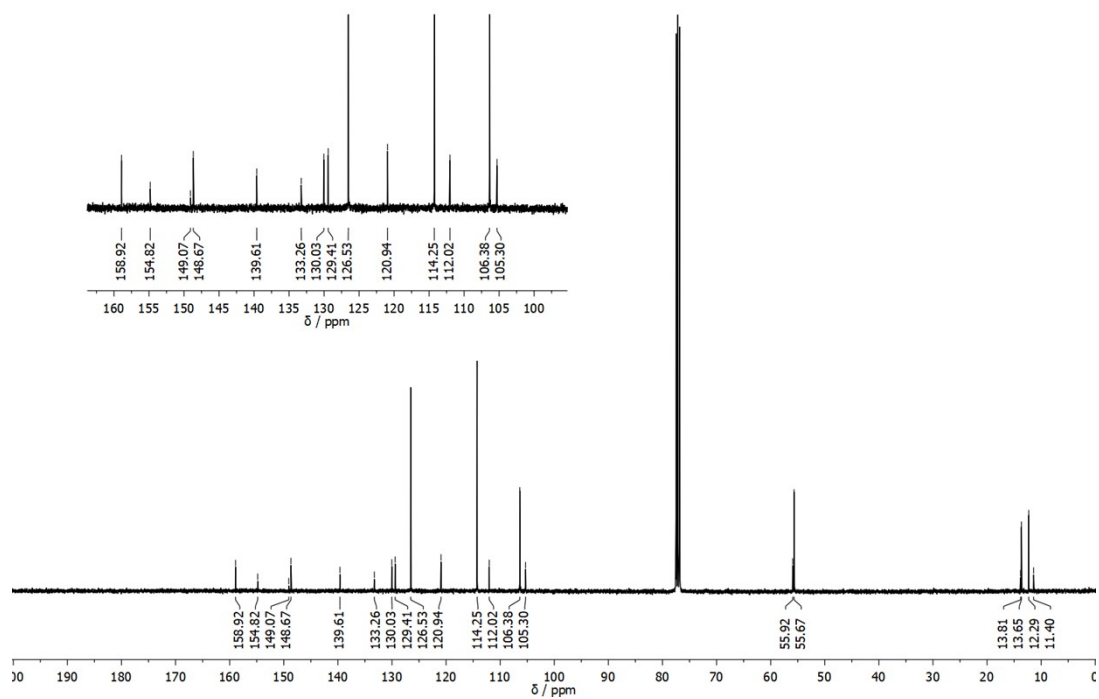

Figure S57. 126 MHz  $^{13}\text{C}$ -NMR of **7f** in  $\text{CDCl}_3$ .

## 9.7 7g NMR Spectra

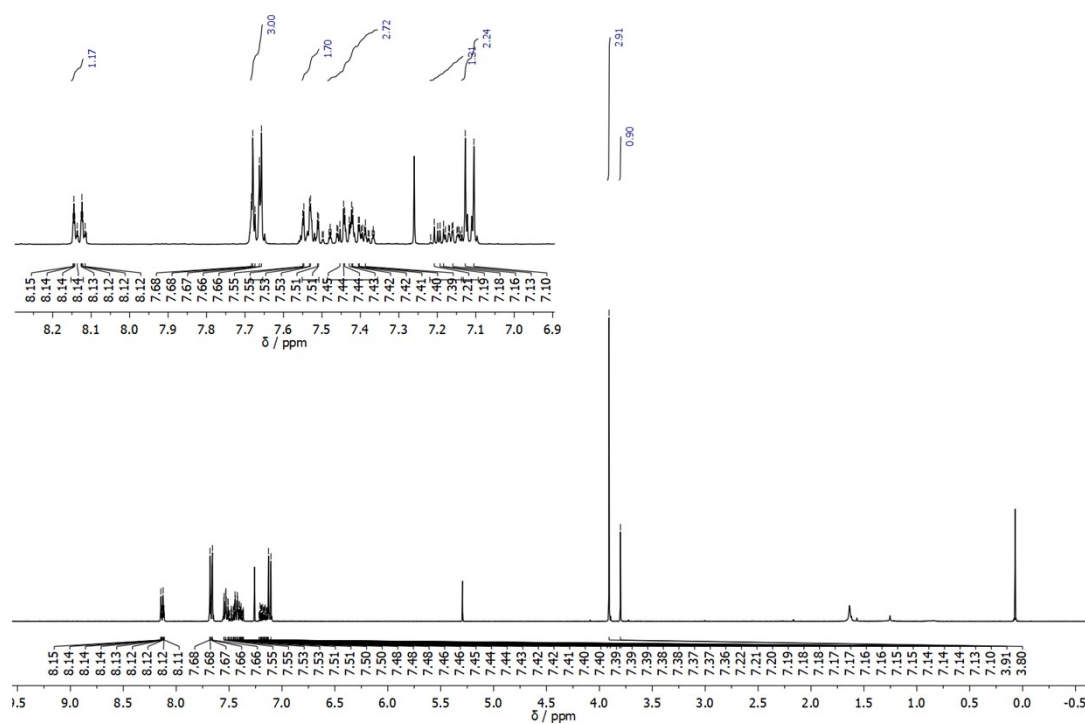

Figure S58. 400 MHz  $^1\text{H}$ -NMR of **7g** in  $\text{CDCl}_3$ .

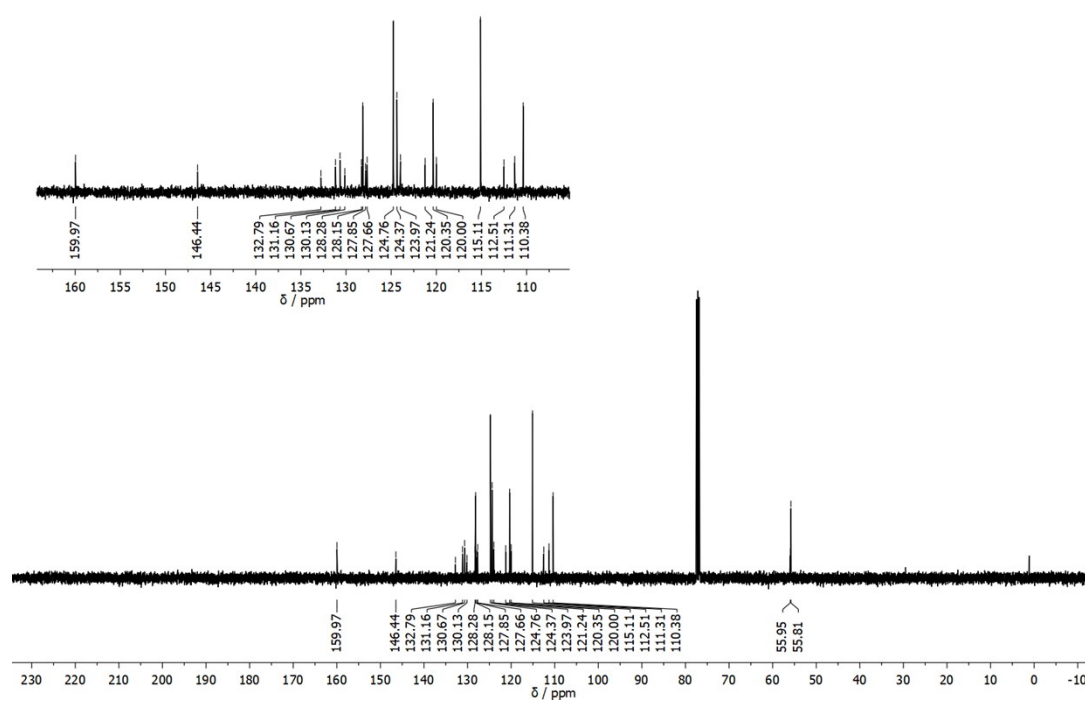

Figure S59. 101 MHz  $^{13}\text{C}$ -NMR of **7g** in  $\text{CDCl}_3$ .

## 9.8 7h NMR Spectra

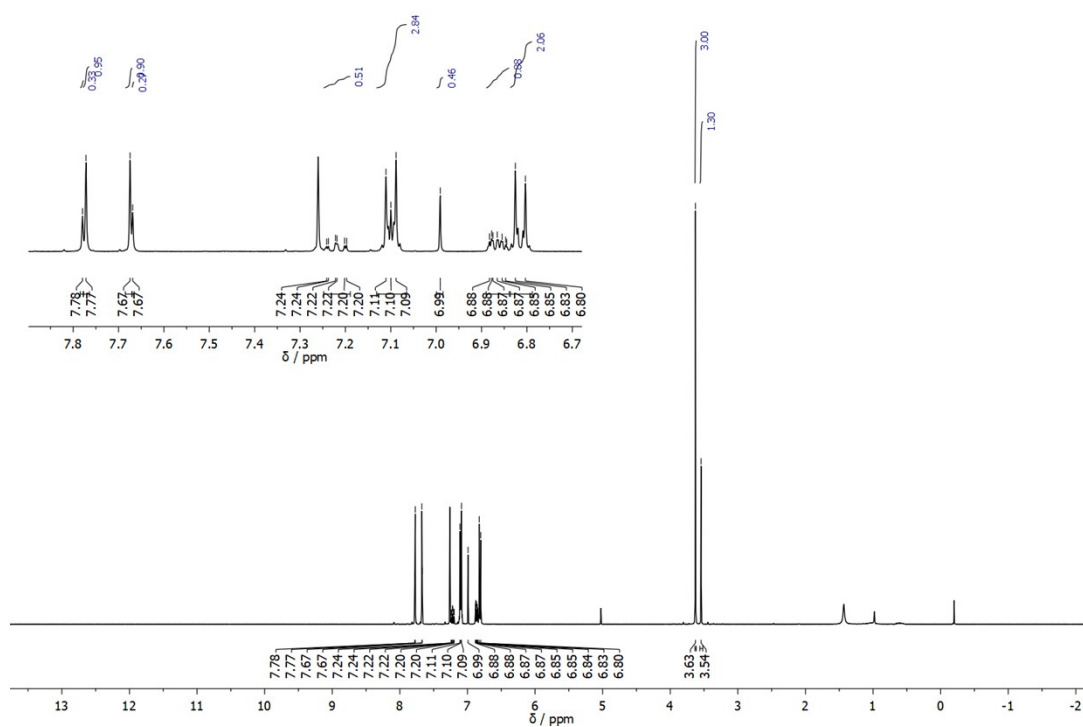

Figure S60. 400 MHz  $^1\text{H}$ -NMR of **7h** in  $\text{CDCl}_3$ .

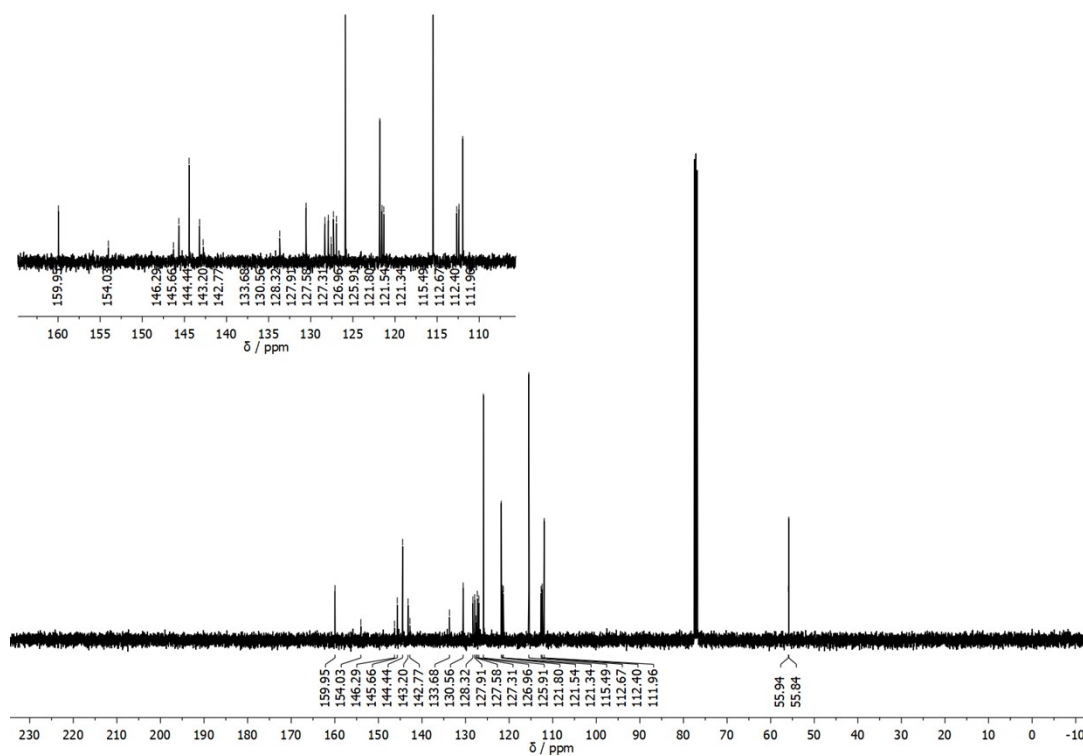

Figure S61. 101 MHz  $^{13}\text{C}$ -NMR of **7h** in  $\text{CDCl}_3$ .

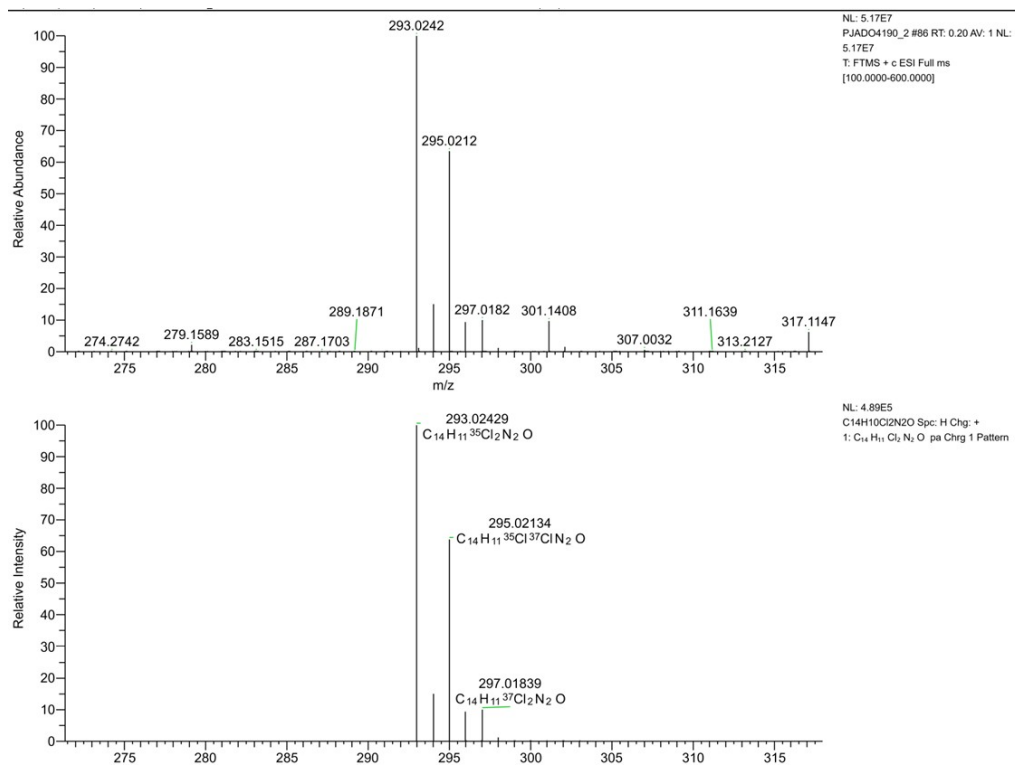

**Figure S62.** ESI-HRMS of **7h**.

## 10 References

- 1 N. A. Romero, K. A. Margrey, N. E. Tay and D. A. Nicewicz, *Science*, 2015, **349**, 1326–1330.
- 2 M. Zheng, I. Ghosh, B. König and X. Wang, *ChemCatChem*, 2019, **11**, 703–706.
- 3 Y. Wang, H. Simon, X. Chen, Z. Lin, S. Chen and L. Ackermann, *Angew. Chemie - Int. Ed.*, 2022, **61**, e202201595.
